# Supplementary material for: S-triggered Schmidt-type rearrangement of vinyl azides to access N-aryl-(trifluoromethylsulfinyl)acetamides
Source: Royal Society of Chemistry journal article supplement (doi:10.1039/d1qo01516h), 2022-01-01

## **S-Triggered Schmidt-type Rearrangement of Vinyl Azides to Access N-Aryl-(trifluoromethylsulfinyl)acetamides**

Zhenhua Liu,<sup>a</sup> Tian Yu,<sup>a</sup> Longhua Li,<sup>a</sup> Wei Fu,<sup>b</sup> Xingxing Gan,<sup>a</sup> Huimin Chen,<sup>a</sup>  
Wen Gao<sup>\*a</sup> and Bo Tang<sup>\*a</sup>

<sup>a</sup>College of Chemistry, Chemical Engineering and Materials Science, Collaborative Innovation Center of Functionalized Probes for Chemical Imaging in Universities of Shandong, Key Laboratory of Molecular and Nano Probes, Ministry of Education, Shandong Provincial Key Laboratory of Clean Production of Fine Chemicals, Shandong Normal University, Jinan, 250014, P. China

<sup>b</sup>Department of Pharmacy, Zibo Central Hospital, Zibo 255000, P. R. China.

E-mail: gaowen@sdnu.edu.cn; tangb@sdnu.edu.cn

## Contents

|                                                                |         |
|----------------------------------------------------------------|---------|
| I. General information .....                                   | S3      |
| II. Optimization of ligands.....                               | S3      |
| III. Synthesis and analytical data of compounds <b>2</b> ..... | S4-S13  |
| IV. Crystallography of compoud <b>2b</b> .....                 | S13-S14 |
| V. NMR spectra copies.....                                     | S15-S41 |

## I. General information

All reagents were purchased from commercial sources and used without treatment, unless otherwise indicated. The products were purified by column chromatography over silica gel. <sup>1</sup>H NMR, <sup>13</sup>C NMR and <sup>19</sup>F spectra were recorded at 298 K on a Varian 400 MHz, 100 MHz and 376 MHz, respectively, and TMS was used as internal standard. Mass spectra were recorded on Bruker Avance III HD 400M NMR Spectrometer. High resolution mass spectra (HRMS) were recorded on Bruker microTof by using ESI method.

## II. Optimization of ligands

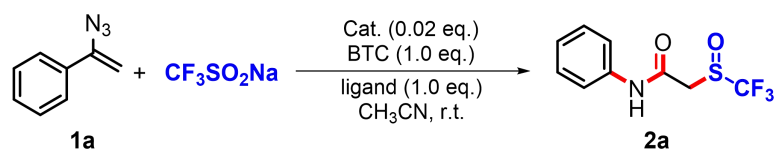

| Entry | Cat.                        | ligand                   | Yield/% <sup>a</sup> |
|-------|-----------------------------|--------------------------|----------------------|
| 1     | $\text{Pd}(\text{PPh}_3)_4$ | $\text{PPh}_3$           | 0                    |
| 2     | $\text{Pd}(\text{PPh}_3)_4$ | $\text{Na}_2\text{CO}_3$ | 0                    |
| 3     | $\text{Pd}(\text{PPh}_3)_4$ | 1,10-phen                | 10                   |
| 4     | $\text{Pd}(\text{PPh}_3)_4$ | EDTA                     | 0                    |
| 5     | $\text{Pd}(\text{PPh}_3)_4$ | PMDETA                   | 0                    |
| 6     | $\text{Pd}(\text{PPh}_3)_4$ | DBU                      | 0                    |
| 7     | $\text{Pd}(\text{PPh}_3)_4$ | TMEDA                    | 0                    |
| 8     | $\text{Pd}(\text{PPh}_3)_4$ | pyridine                 | 15                   |
| 9     | $\text{Pd}(\text{PPh}_3)_4$ | DMAP                     | trace                |
| 10    | $\text{Pd}(\text{PPh}_3)_4$ | 4,4'-bipyridine          | 20                   |

<sup>a</sup>Conditions: **1a** (0.5 mmol),  $\text{CF}_3\text{SO}_2\text{Na}$  (0.75 mmol), BTC (0.5 mmol), ligand (0.5 mmol),  $\text{Pd}(\text{PPh}_3)_4$  (0.01 mmol),  $\text{CH}_3\text{CN}$  (2 mL) at r.t. under Ar for 3 h; Yields of isolated products. EDTA = ethylenediaminetetraacetic acid; PMDETA = N,N,N',N'',N''-pentamethyldiethylenetriamine; DMAP = 4-dimethylaminopyridine; DBU=1,8-diazabicyclo[5,4,0]undec-7-ene; TMEDA = N,N,N',N'-tetramethylethylenediamine.

## II. Synthesis and analytical data of compounds 2

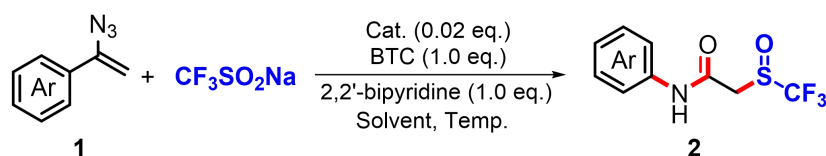

**General procedure:** Under argon atmosphere, sodium trifluoromethanesulfinate (117.0 mg, 0.75 mmol, 1.5 eq.), triphosgene (BTC) (148.4 mg, 0.5 mmol, 1.0 eq.), 2,2'-bipyridine (78.1 mg, 0.5 mmol, 1.0 eq.), Pd(PPh<sub>3</sub>)<sub>4</sub> (11.6 mg, 0.01 mmol, 0.02 eq.) were added in an oven-dried 15 mL Schlenk tube with 1 mL CH<sub>3</sub>CN, then vinyl azide 1 (78.0 μL, 0.5 mmol, 1.0 eq.) in 1 mL CH<sub>3</sub>CN was added in the above mixed solution. The reaction mixture was then stirred for 3 h at room temperature when TLC conformed that substrate 1 had been consumed. The reaction was followed by adding 30 mL H<sub>2</sub>O and taken up with dichloromethane (3×15 mL). The combined organic layer was washed with brine (3×40 mL), dried over MgSO<sub>4</sub> and concentrated under reduced pressure. The residue was purified by a silica gel column chromatography (petroleum ether/ethyl acetate) and the target product was afforded.

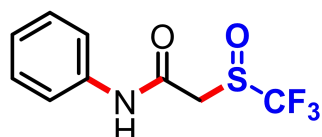

**(2a) 0.5 mmol scale:** Prepared following the general procedure showed above using (1-azidovinyl)benzene (72.5 mg, 0.5 mmol, 1.0 eq.), sodium trifluoromethanesulfinate (117.0 mg, 0.75 mmol, 1.5 eq.), BTC (148.4 mg, 0.5 mmol, 1.0 eq.), 2,2'-bipyridine (78.1 mg, 0.5 mmol, 1.0 eq.), Pd(PPh<sub>3</sub>)<sub>4</sub> (11.6 mg, 0.01 mmol, 0.02 eq.), The desired product was purified by a silica gel column chromatography (petroleum ether/ethyl acetate=3:1) as white solid (103.0 mg, 82%); <sup>1</sup>H NMR (400 MHz, CDCl<sub>3</sub>) δ 8.20 (s, 1H), 7.53-7.47 (m, 2H), 7.38-7.30 (m, 2H), 7.22-7.13 (m, 1H), 3.94 (s, 2H); <sup>13</sup>C NMR (100 MHz, CDCl<sub>3</sub>) δ 159.8, 136.7, 129.2, 125.5, 125.1 (q, *J* = 334.8 Hz), 120.4, 53.4; <sup>19</sup>F NMR (376 MHz, CDCl<sub>3</sub>) δ -71.96; **HRMS** (ESI-TOF) *m/z* calculated for C<sub>9</sub>H<sub>8</sub>F<sub>3</sub>NO<sub>2</sub>SNa [M+Na]<sup>+</sup>: 274.0126, found: 274.0135.

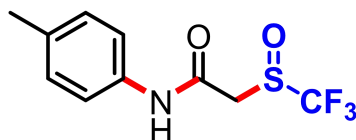

**(2b) 0.5 mmol scale:** Prepared following the general procedure showed above using 1-(1-azidovinyl)-4-methylbenzene (79.5 mg, 0.5 mmol, 1.0 eq.), sodium trifluoromethyl sulfonate (117.0 mg, 0.75 mmol, 1.5 eq.), BTC (148.4 mg, 0.5 mmol, 1.0 eq.), 2,2'-bipyridine (78.1 mg, 0.5 mmol, 1.0 eq.), Pd(PPh<sub>3</sub>)<sub>4</sub> (11.6 mg, 0.01 mmol, 0.02 eq.), The desired product was purified by a silica gel column chromatography (petroleum ether/ethyl acetate=3:1) as white solid (116.7 mg, 88%); **<sup>1</sup>H NMR** (400 MHz, CDCl<sub>3</sub>) δ 8.19 (s, 1H), 7.39-7.33 (m, 2H), 7.15-7.08 (m, 2H), 3.99-3.88 (m, 2H), 2.32 (s, 3H); **<sup>13</sup>C NMR** (100 MHz, CDCl<sub>3</sub>) δ 159.7, 135.2, 134.2, 129.6, 125.1 (q, *J* = 333.8 Hz), 120.4, 53.4, 20.9; **<sup>19</sup>F NMR** (376 MHz, CDCl<sub>3</sub>) δ -72.06 ; **HRMS** (ESI-TOF) *m/z* calculated for C<sub>10</sub>H<sub>10</sub>F<sub>3</sub>NO<sub>2</sub>SNa [M+Na]<sup>+</sup>: 288.0282, found: 288.0289.

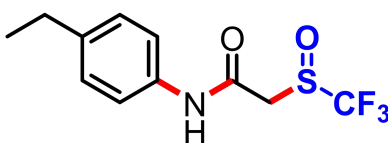

**(2c) 0.5 mmol scale:** Prepared following the general procedure showed above using 1-(1-azidovinyl)-4-ethylbenzene (86.5 mg, 0.5 mmol, 1.0 eq.), sodium trifluoromethanesulfinate (117.0 mg, 0.75 mmol, 1.5 eq.), BTC (148.4 mg, 0.5 mmol, 1.0 eq.), 2,2'-bipyridine (78.1 mg, 0.5 mmol, 1.0 eq.), Pd(PPh<sub>3</sub>)<sub>4</sub> (11.6 mg, 0.01 mmol, 0.02 eq.), The desired product was purified by a silica gel column chromatography (petroleum ether/ethyl acetate=3:1) as white solid (117.3 mg, 84%); **<sup>1</sup>H NMR** (400 MHz, CDCl<sub>3</sub>) δ 8.17 (s, 1H), 7.43-7.35 (m, 2H), 7.18-7.12 (m, 2H), 3.99-3.88 (m, 2H), 2.66-2.55 (m, 2H), 1.21 (t, *J* = 7.6 Hz, 3H); **<sup>13</sup>C NMR** (100 MHz, CDCl<sub>3</sub>) δ 159.7, 141.7, 134.3, 128.5, 125.1 (q, *J* = 328.5 Hz), 120.5, 53.7, 28.4, 15.6; **<sup>19</sup>F NMR** (376 MHz, CDCl<sub>3</sub>) δ -72.04; **HRMS** (ESI-TOF) *m/z* calculated for C<sub>11</sub>H<sub>12</sub>F<sub>3</sub>NO<sub>2</sub>SNa [M+Na]<sup>+</sup>: 302.0439, found: 302.0432.

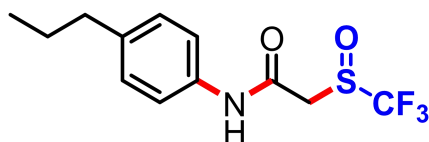

**(2d) 0.5 mmol scale:** Prepared following the general procedure showed above using 1-(1-azidovinyl)-4-propylbenzene (93.5 mg, 0.5 mmol, 1.0 eq.), sodium trifluoromethanesulfinate (117.0 mg, 0.75 mmol, 1.5 eq.), BTC (148.4 mg, 0.5 mmol, 1.0 eq.), 2,2'-bipyridine (78.1 mg, 0.5 mmol, 1.0 eq.), Pd(PPh<sub>3</sub>)<sub>4</sub> (11.6 mg, 0.01 mmol, 0.02 eq.), The desired product was purified by a silica gel column chromatography (petroleum ether/ethyl acetate=3:1) as white solid (126.1 mg, 86%); **<sup>1</sup>H NMR** (400 MHz, CDCl<sub>3</sub>) δ 8.11 (s, 1H), 7.42-7.36 (m, 2H), 7.17-7.11 (m, 2H), 3.98-3.88 (m, 2H), 2.61-2.51 (m, 2H), 1.66-1.59 (m, 2H), 0.93 (t, *J* = 7.3 Hz, 3H); **<sup>13</sup>C NMR** (100 MHz, CDCl<sub>3</sub>) δ 159.6, 140.1, 134.3, 129.1, 125.1 (q, *J* = 325.6 Hz), 120.4, 53.6, 37.5, 24.5, 13.7; **<sup>19</sup>F NMR** (376 MHz, CDCl<sub>3</sub>) δ -72.08; **HRMS** (ESI-TOF) *m/z* calculated for C<sub>12</sub>H<sub>14</sub>F<sub>3</sub>NO<sub>2</sub>SNa [M+Na]<sup>+</sup>: 316.0595, found: 316.0592.

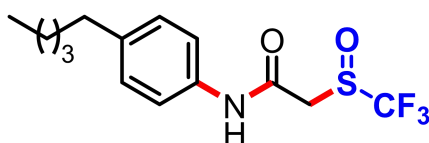

**(2e) 0.5 mmol scale:** Prepared following the general procedure showed above using 1-(1-azidovinyl)-4-pentylbenzene (107.5 mg, 0.5 mmol, 1.0 eq.), sodium trifluoromethanesulfinate (117.0 mg, 0.75 mmol, 1.5 eq.), BTC (148.4 mg, 0.5 mmol, 1.0 eq.), 2,2'-bipyridine (78.1 mg, 0.5 mmol, 1.0 eq.), Pd(PPh<sub>3</sub>)<sub>4</sub> (11.6 mg, 0.01 mmol, 0.02 eq.), The desired product was purified by a silica gel column chromatography (petroleum ether/ethyl acetate=3:1) as white solid (121.9 mg, 78%); **<sup>1</sup>H NMR** (400 MHz, CDCl<sub>3</sub>) δ 8.30 (s, 1H), 7.38-7.34 (m, 2H), 7.12-7.07 (m, 2H), 4.04-3.87 (m, 2H), 2.64-2.48 (m, 2H), 1.65-1.52 (m, 2H), 1.35-1.27 (m, 4H), 0.89 (t, *J* = 6.9 Hz, 3H); **<sup>13</sup>C NMR** (100 MHz, CDCl<sub>3</sub>) δ 159.8, 140.3, 134.3, 129.0, 125.2 (q, *J* = 338.1 Hz), 120.4, 54.2, 35.4, 31.4, 31.1, 22.5, 14.0; **<sup>19</sup>F NMR** (376 MHz, CDCl<sub>3</sub>) δ -72.12; **HRMS** (ESI-TOF) *m/z* calculated for C<sub>14</sub>H<sub>18</sub>F<sub>3</sub>NO<sub>2</sub>SNa [M+Na]<sup>+</sup>: 344.0908, found: 344.0912.

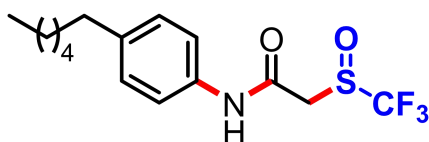

**(2f) 0.5 mmol scale:** Prepared following the general procedure showed above using 1-(1-azidovinyl)-4-hexylbenzene (114.5 mg, 0.5 mmol, 1.0 eq.), sodium trifluoromethanesulfinate (117.0 mg, 0.75 mmol, 1.5 eq.), BTC (148.4 mg, 0.5 mmol, 1.0 eq.), 2,2'-bipyridine (78.1 mg, 0.5 mmol, 1.0 eq.), Pd(PPh<sub>3</sub>)<sub>4</sub> (11.6 mg, 0.01 mmol, 0.02 eq.), The desired product was purified by a silica gel column chromatography (petroleum ether/ethyl acetate=3:1) as white solid (130.7 mg, 78%); <sup>1</sup>H NMR (400 MHz, CDCl<sub>3</sub>) δ 8.43 (s, 1H), 7.37-7.30 (m, 2H), 7.12-7.04 (m, 2H), 4.07-3.87 (m, 2H), 2.64-2.48 (m, 2H), 1.62-1.51 (m, 2H), 1.34-1.24 (m, 6H), 0.95-0.85 (m, 3H); <sup>13</sup>C NMR (100 MHz, CDCl<sub>3</sub>) δ 159.8, 140.3, 134.3, 128.9, 125.2 (q, *J* = 329.7 Hz), 120.4, 54.4, 35.4, 31.7, 31.4, 28.9, 22.6, 14.1; <sup>19</sup>F NMR (376 MHz, CDCl<sub>3</sub>) δ -72.22; HRMS (ESI-TOF) *m/z* calculated for C<sub>15</sub>H<sub>20</sub>F<sub>3</sub>NO<sub>2</sub>SNa [M+Na]<sup>+</sup>: 358.1065, found: 358.1067.

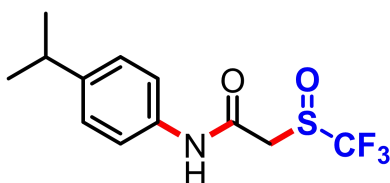

**(2g) 0.5 mmol scale:** Prepared following the general procedure showed above using 4-iso-propyl phenylenyl azide (93.5 mg, 0.5 mmol, 1.0 eq.), sodium trifluoromethanesulfinate (117.0 mg, 0.75 mmol, 1.5 eq.), BTC (148.4 mg, 0.5 mmol, 1.0 eq.), 2,2'-bipyridine (78.1 mg, 0.5 mmol, 1.0 eq.), Pd(PPh<sub>3</sub>)<sub>4</sub> (11.6 mg, 0.01 mmol, 0.02 eq.), The desired product was purified by a silica gel column chromatography (petroleum ether/ethyl acetate=3:1) as white solid (123.2 mg, 84%); <sup>1</sup>H NMR (400 MHz, CDCl<sub>3</sub>) δ 8.25 (s, 1H), 7.41-7.35 (m, 2H), 7.20-7.15 (m, 2H), 4.02-3.88 (m, 2H), 2.93-2.82 (m, 1H), 1.22 (d, *J* = 6.9 Hz, 6H); <sup>13</sup>C NMR (100 MHz, CDCl<sub>3</sub>) δ 159.7, 146.2, 134.4, 127.0, 125.1 (q, *J* = 335.8 Hz), 120.5, 53.9, 33.6, 23.9; <sup>19</sup>F NMR (376 MHz, CDCl<sub>3</sub>) δ -72.11; HRMS (ESI-TOF) *m/z* calculated for C<sub>12</sub>H<sub>14</sub>F<sub>3</sub>NO<sub>2</sub>SNa [M+Na]<sup>+</sup>: 316.0595, found: 316.0605.

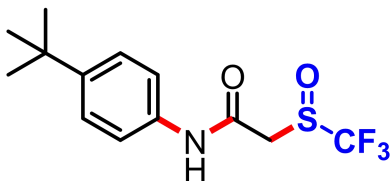

**(2h) 0.5 mmol scale:** Prepared following the general procedure showed above using 1-(1-azidovinyl)-4-(tert-butyl)benzene (100.5 mg, 0.5 mmol, 1.0 eq.), sodium trifluoromethanesulfinate (117.0 mg, 0.75 mmol, 1.5 eq.), BTC (148.4 mg, 0.5 mmol, 1.0 eq.), 2,2'-bipyridine (78.1 mg, 0.5 mmol, 1.0 eq.), Pd(PPh<sub>3</sub>)<sub>4</sub> (11.6 mg, 0.01 mmol, 0.02 eq.), The desired product was purified by a silica gel column chromatography (petroleum ether/ethyl acetate=3:1) as white solid (124.5 mg, 81%); **<sup>1</sup>H NMR** (400 MHz, CDCl<sub>3</sub>) δ 8.35 (s, 1H), 7.42-7.36 (m, 2H), 7.35-7.30 (m, 2H), 4.03-3.87 (m, 2H), 1.29 (s, 9H); **<sup>13</sup>C NMR** (100 MHz, CDCl<sub>3</sub>) δ 159.8, 148.5, 134.1, 125.9, 125.1 (q, *J* = 333.5 Hz), 120.2, 54.3, 34.5, 31.3; **<sup>19</sup>F NMR** (376 MHz, CDCl<sub>3</sub>) δ -72.09; **HRMS** (ESI-TOF) *m/z* calculated for C<sub>13</sub>H<sub>16</sub>F<sub>3</sub>NO<sub>2</sub>SNa [M+Na]<sup>+</sup>: 330.0752, found: 330.0756.

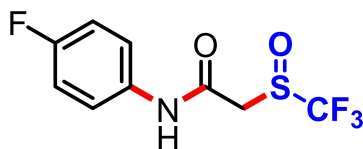

**(2i) 0.5 mmol scale:** Prepared following the general procedure showed above using 1-(1-azidovinyl)-4-fluorobenzene (81.5 mg, 0.5 mmol, 1.0 eq.), sodium trifluoromethanesulfinate (117.0 mg, 0.75 mmol, 1.5 eq.), BTC (148.4 mg, 0.5 mmol, 1.0 eq.), 2,2'-bipyridine (78.1 mg, 0.5 mmol, 1.0 eq.), Pd(PPh<sub>3</sub>)<sub>4</sub> (11.6 mg, 0.01 mmol, 0.02 eq.), The desired product was purified by a silica gel column chromatography (petroleum ether/ethyl acetate=3:1) as white solid (98.3 mg, 73%); **<sup>1</sup>H NMR** (400 MHz, CDCl<sub>3</sub>) δ 8.33 (s, 1H), 7.49-7.38 (m, 2H), 7.03-6.95 (m, 2H), 4.03-3.88 (m, 2H); **<sup>13</sup>C NMR** (100 MHz, CDCl<sub>3</sub>) δ 160.7, 159.3 (d, *J* = 247.7 Hz), 133.9, 125.5 (q, *J* = 334.6 Hz), 121.6 (d, *J* = 8.9 Hz), 115.4 (d, *J* = 22.3 Hz), 56.2; **<sup>19</sup>F NMR** (376 MHz, CDCl<sub>3</sub>) δ -71.89, -116.18; **HRMS** (ESI-TOF) *m/z* calculated for C<sub>9</sub>H<sub>7</sub>F<sub>4</sub>NO<sub>2</sub>SNa [M+Na]<sup>+</sup>: 292.0031, found: 292.0006.



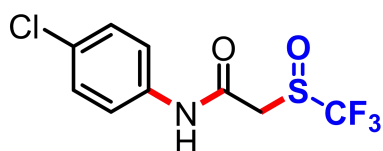

**(2j) 0.5 mmol scale:** Prepared following the general procedure showed above using 1-(1-azidovinyl)-4-chlorobenzene (89.5 mg, 0.5 mmol, 1.0 eq.), sodium trifluoromethanesulfinate (117.0 mg, 0.75 mmol, 1.5 eq.), BTC (148.4 mg, 0.5 mmol, 1.0 eq.), 2,2'-bipyridine (78.1 mg, 0.5 mmol, 1.0 eq.), Pd(PPh<sub>3</sub>)<sub>4</sub> (11.6 mg, 0.01 mmol, 0.02 eq.), The desired product was purified by a silica gel column chromatography (petroleum ether/ethyl acetate=3:1) as white solid (112.8 mg, 79%); **<sup>1</sup>H NMR** (400 MHz, CDCl<sub>3</sub>) δ 8.43 (s, 1H), 7.43-7.37 (m, 2H), 7.28-7.22 (m, 2H), 4.10-3.80 (m, 2H); **<sup>13</sup>C NMR** (100 MHz, CDCl<sub>3</sub>) δ 159.8, 135.3, 130.5, 129.1, 125.0 (q, *J* = 326.1 Hz), 121.4, 53.7; **<sup>19</sup>F NMR** (376 MHz, CDCl<sub>3</sub>) δ -71.86; **HRMS** (ESI-TOF) *m/z* calculated for C<sub>9</sub>H<sub>7</sub>ClF<sub>3</sub>NO<sub>2</sub>SNa [M+Na]<sup>+</sup> : 307.9736, found: 307.9713.

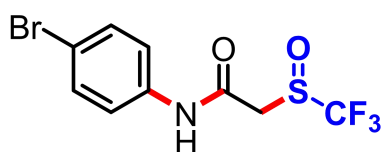

**(2k) 0.5 mmol scale:** Prepared following the general procedure showed above using 1-(1-azidovinyl)-4-bromobenzene (111.5 mg, 0.5 mmol, 1.0 eq.), sodium trifluoromethanesulfinate (117.0 mg, 0.75 mmol, 1.5 eq.), BTC (148.4 mg, 0.5 mmol, 1.0 eq.), 2,2'-bipyridine (78.1 mg, 0.5 mmol, 1.0 eq.), Pd(PPh<sub>3</sub>)<sub>4</sub> (11.6 mg, 0.01 mmol, 0.02 eq.), The desired product was purified by a silica gel column chromatography (petroleum ether/ethyl acetate=3:1) as white solid (125.4 mg, 76%); **<sup>1</sup>H NMR** (400 MHz, CDCl<sub>3</sub>) δ 8.37 (s, 1H), 7.45-7.35 (m, 4H), 4.01-3.88 (m, 2H); **<sup>13</sup>C NMR** (100 MHz, CDCl<sub>3</sub>) δ 159.8, 135.8, 132.1, 125.0 (q, *J* = 334.8 Hz), 121.8, 118.2, 53.3; **<sup>19</sup>F NMR** (376 MHz, CDCl<sub>3</sub>) δ -71.81; **HRMS** (ESI-TOF) *m/z* calculated for C<sub>9</sub>H<sub>7</sub>BrF<sub>3</sub>NO<sub>2</sub>SNa [M+Na]<sup>+</sup> : 351.9231, found: 351.9209.

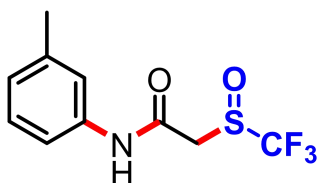

**(2l) 0.5 mmol scale:** Prepared following the general procedure showed above using 1-(1-azidovinyl)-3-methylbenzene (79.5 mg, 0.5 mmol, 1.0 eq.), sodium trifluoromethanesulfinate (117.0 mg, 0.75 mmol, 1.5 eq.), BTC (148.4 mg, 0.5 mmol, 1.0 eq.), 2,2'-bipyridine (78.1 mg, 0.5 mmol, 1.0 eq.), Pd(PPh<sub>3</sub>)<sub>4</sub> (11.6 mg, 0.01 mmol, 0.02 eq.), The desired product was purified by a silica gel column chromatography (petroleum ether/ethyl acetate=3:1) as white solid (108.8 mg, 82%); <sup>1</sup>H NMR (400 MHz, CDCl<sub>3</sub>) δ 8.28 (s, 1H), 7.35-7.24 (m, 2H), 7.22-7.15 (m, 1H), 7.00-6.93 (m, 1H), 4.02-3.88 (m, 2H), 2.31 (s, 3H); <sup>13</sup>C NMR (100 MHz, CDCl<sub>3</sub>) δ 159.8, 139.1, 136.6, 128.9, 126.3, 125.0 (q, *J* = 331.0 Hz), 121.0, 117.4, 54.0, 21.4; <sup>19</sup>F NMR (376 MHz, CDCl<sub>3</sub>) δ -72.02; HRMS (ESI-TOF) *m/z* calculated for C<sub>10</sub>H<sub>10</sub>F<sub>3</sub>NO<sub>2</sub>SNa [M+Na]<sup>+</sup>: 288.0282, found: 288.0279.

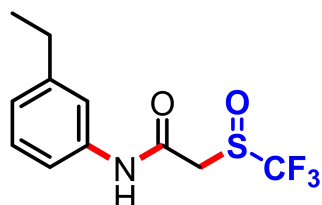

**(2m) 0.5 mmol scale:** Prepared following the general procedure showed above using 1-(1-azidovinyl)-3-ethylbenzene (86.5 mg, 0.5 mmol, 1.0 eq.), sodium trifluoromethanesulfinate (117.0 mg, 0.75 mmol, 1.5 eq.), BTC (148.4 mg, 0.5 mmol, 1.0 eq.), 2,2'-bipyridine (78.1 mg, 0.5 mmol, 1.0 eq.), Pd(PPh<sub>3</sub>)<sub>4</sub> (11.6 mg, 0.01 mmol, 0.02 eq.), The desired product was purified by a silica gel column chromatography (petroleum ether/ethyl acetate=3:1) as white solid (115.9 mg, 83%); <sup>1</sup>H NMR (400 MHz, CDCl<sub>3</sub>) δ 8.14 (s, 1H), 7.36-7.30 (m, 2H), 7.27-7.21 (m, 1H), 7.04-6.98 (m, 1H), 3.93 (s, 2H), 2.69-2.58 (m, 2H), 1.23 (t, *J* = 7.6 Hz, 3H); <sup>13</sup>C NMR (100 MHz, CDCl<sub>3</sub>) δ 159.7, 145.6, 136.7, 129.1, 125.2 (q, *J* = 339.1 Hz), 125.1, 119.9, 117.8, 53.4, 28.8, 15.4; <sup>19</sup>F NMR (376 MHz, CDCl<sub>3</sub>) δ -72.05; HRMS (ESI-TOF) *m/z* calculated for C<sub>11</sub>H<sub>12</sub>F<sub>3</sub>NO<sub>2</sub>SNa [M+Na]<sup>+</sup>: 302.0439, found: 302.0427.

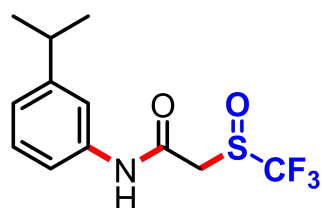

**(2n) 0.5 mmol scale:** Prepared following the general procedure showed above using 1-(1-azidovinyl)-3-isopropylbenzene (93.5 mg, 0.5 mmol, 1.0 eq.), sodium trifluoromethanesulfinate (117.0 mg, 0.75 mmol, 1.5 eq.), BTC (148.4 mg, 0.5 mmol, 1.0 eq.), 2,2'-bipyridine (78.1 mg, 0.5 mmol, 1.0 eq.), Pd(PPh<sub>3</sub>)<sub>4</sub> (11.6 mg, 0.01 mmol, 0.02 eq.), The desired product was purified by a silica gel column chromatography (petroleum ether/ethyl acetate=3:1) as white solid (118.8 mg, 81%); <sup>1</sup>H NMR (400 MHz, CDCl<sub>3</sub>) δ 8.21 (s, 1H), 7.37-7.31 (m, 2H), 7.26-7.20 (m, 1H), 7.06-6.99 (m, 1H), 4.01-3.88 (m, 2H), 2.93-2.82 (m, 1H), 1.23 (d, *J* = 6.9 Hz, 6H); <sup>13</sup>C NMR (100 MHz, CDCl<sub>3</sub>) δ 159.7, 150.2, 136.7, 129.1, 125.1 (q, *J* = 333.6 Hz), 123.6, 118.5, 117.9, 53.8, 34.1, 23.9; <sup>19</sup>F NMR (376 MHz, CDCl<sub>3</sub>) δ -72.12; HRMS (ESI-TOF) *m/z* calculated for C<sub>12</sub>H<sub>14</sub>F<sub>3</sub>NO<sub>2</sub>SNa [M+Na]<sup>+</sup>: 316.0595, found: 316.0604.

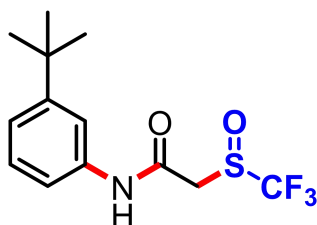

**(2o) 0.5 mmol scale:** Prepared following the general procedure showed above using 1-(1-azidovinyl)-3-(tert-butyl)benzene (100.5 mg, 0.5 mmol, 1.0 eq.), sodium trifluoromethanesulfinate (117.0 mg, 0.75 mmol, 1.5 eq.), BTC (148.4 mg, 0.5 mmol, 1.0 eq.), 2,2'-bipyridine (78.1 mg, 0.5 mmol, 1.0 eq.), Pd(PPh<sub>3</sub>)<sub>4</sub> (11.6 mg, 0.01 mmol, 0.02 eq.), The desired product was purified by a silica gel column chromatography (petroleum ether/ethyl acetate=3:1) as white solid (122.9 mg, 80%); <sup>1</sup>H NMR (400 MHz, CDCl<sub>3</sub>) δ 8.16 (s, 1H), 7.45-7.42 (m, 1H), 7.41-7.35 (m, 1H), 7.30-7.22 (m, 1H), 7.21-7.17 (m, 1H), 4.01-3.88 (m, 2H), 1.30 (s, 9H); <sup>13</sup>C NMR (100 MHz, CDCl<sub>3</sub>) δ 159.7, 152.5, 136.5, 128.8, 125.2 (q, *J* = 330.6 Hz), 122.6, 117.7, 117.5, 53.8, 34.8, 31.2; <sup>19</sup>F NMR (376 MHz, CDCl<sub>3</sub>) δ -72.13; HRMS (ESI-TOF) *m/z* calculated for C<sub>13</sub>H<sub>16</sub>F<sub>3</sub>NO<sub>2</sub>SNa [M+Na]<sup>+</sup>: 330.0752, found: 330.0747.

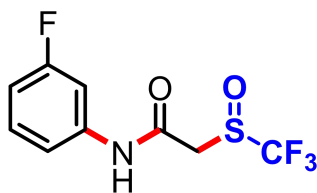

**(2p) 0.5 mmol scale:** Prepared following the general procedure showed above using 1-(1-azidovinyl)-3-fluorobenzene (81.5 mg, 0.5 mmol, 1.0 eq.), sodium trifluoromethanesulfinate (117.0 mg, 0.75 mmol, 1.5 eq.), BTC (148.4 mg, 0.5 mmol, 1.0 eq.), 2,2'-bipyridine (78.1 mg, 0.5 mmol, 1.0 eq.), Pd(PPh<sub>3</sub>)<sub>4</sub> (11.6 mg, 0.01 mmol, 0.02 eq.), The desired product was purified by a silica gel column chromatography (petroleum ether/ethyl acetate=3:1) as white solid (114.4 mg, 85%); <sup>1</sup>H NMR (400 MHz, CDCl<sub>3</sub>) δ 8.57 (s, 1H), 7.45-7.35 (m, 1H), 7.26-7.17 (m, 1H), 7.12-7.05 (m, 1H), 6.88-6.79 (m, 1H), 4.08-3.90 (m, 2H); <sup>13</sup>C NMR (100 MHz, CDCl<sub>3</sub>) δ 162.8 (d, *J* = 241.9 Hz), 160.9, 139.3 (d, *J* = 11.4 Hz), 130.1 (d, *J* = 18.8 Hz), 125.1 (q, *J* = 339.7 Hz), 115.3, 111.4 (d, *J* = 19.5 Hz), 107.4 (d, *J* = 23.1 Hz), 56.2; <sup>19</sup>F NMR (376 MHz, CDCl<sub>3</sub>) δ -71.79, -110.86; HRMS (ESI-TOF) *m/z* calculated for C<sub>9</sub>H<sub>7</sub>F<sub>4</sub>NO<sub>2</sub>SNa [M+Na]<sup>+</sup>: 292.0031, found: 292.0009.

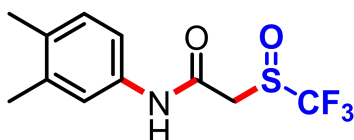

**(2q) 0.5 mmol scale:** Prepared following the general procedure showed above using 4-(1-azidovinyl)-1,2-dimethylbenzene (86.5 mg, 0.5 mmol, 1.0 eq.), sodium trifluoromethanesulfinate (117.0 mg, 0.75 mmol, 1.5 eq.), BTC (148.4 mg, 0.5 mmol, 1.0 eq.), 2,2'-bipyridine (78.1 mg, 0.5 mmol, 1.0 eq.), Pd(PPh<sub>3</sub>)<sub>4</sub> (11.6 mg, 0.01 mmol, 0.02 eq.), The desired product was purified by a silica gel column chromatography (petroleum ether/ethyl acetate=3:1) as white solid (113.1 mg, 81%); <sup>1</sup>H NMR (400 MHz, CDCl<sub>3</sub>) δ 8.09 (s, 1H), 7.26-7.19 (m, 2H), 7.11-7.05 (m, 1H), 3.98-3.86 (m, 2H), 2.23 (d, *J* = 5.2 Hz, 6H). <sup>13</sup>C NMR (100 MHz, CDCl<sub>3</sub>) δ 159.6, 137.5, 134.4, 134.0, 130.1, 125.1 (q, *J* = 327.8 Hz), 121.7, 118.0, 53.6, 19.8, 19.2; <sup>19</sup>F NMR (376 MHz, CDCl<sub>3</sub>) δ -72.13; HRMS (ESI-TOF) *m/z* calculated for C<sub>11</sub>H<sub>12</sub>F<sub>3</sub>NO<sub>2</sub>SNa [M+Na]<sup>+</sup>: 302.0439, found: 302.0426.

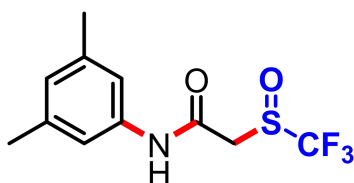

**(2r) 0.5 mmol scale:** Prepared following the general procedure showed above using 1-(1-azidovinyl)-3,5-dimethylbenzene (86.5 mg, 0.5 mmol, 1.0 eq.), sodium trifluoromethanesulfinate (117.0 mg, 0.75 mmol, 1.5 eq.), BTC (148.4 mg, 0.5 mmol, 1.0 eq.), 2,2'-bipyridine (78.1 mg, 0.5 mmol, 1.0 eq.), Pd(PPh<sub>3</sub>)<sub>4</sub> (11.6 mg, 0.01 mmol, 0.02 eq.), The desired product was purified by a silica gel column chromatography (petroleum ether/ethyl acetate=3:1) as white solid (114.5 mg, 82%); <sup>1</sup>H NMR (400 MHz, CDCl<sub>3</sub>) δ 8.02 (s, 1H), 7.13 (s, 2H), 6.81 (s, 1H), 3.91 (s, 2H), 2.30 (s, 6H). <sup>13</sup>C NMR (100 MHz, CDCl<sub>3</sub>) δ 165.5, 143.2, 142.4, 131.1, 127.0 (q, *J* = 363.7 Hz), 122.4, 61.1, 26.1, 23.2; <sup>19</sup>F NMR (376 MHz, CDCl<sub>3</sub>) δ -72.00; HRMS (ESI-TOF) *m/z* calculated for C<sub>11</sub>H<sub>12</sub>F<sub>3</sub>NO<sub>2</sub>SNa [M+Na]<sup>+</sup>: 302.0439, found: 302.0423.

#### IV. Crystallography of compound 2b

Single-crystal X-ray diffraction data for the reported complex was recorded at a temperature of 293(2) K on a Oxford Diffraction Gemini R Ultra diffractometer, using a  $\omega$  scan technique with Mo-K $\alpha$  radiation ( $\lambda = 0.71073$  Å). The structure was solved by Direct Method of SHELXS-97 and refined by full-matrix least-squares techniques using the SHELXL-97 program.<sup>1</sup> Non-hydrogen atoms were refined with anisotropic temperature parameters, and hydrogen atoms of the ligands were refined as rigid groups. Basic information pertaining to crystal parameters and structure refinement is summarized in Table 1. 1 (a) G. M. Sheldrick, SHELXS-97, Program for Solution of Crystal Structures, University of Gottingen, Germany, 1997; (b) G. M. Sheldrick, SHELXL-97, Program for Refinement of Crystal Structures, University of Gottingen, Germany, 1997.

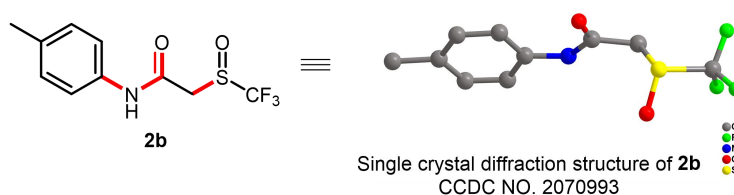

**Table 1.** Crystal data and structure refinement.

|                                                   |                                                                                                                           |
|---------------------------------------------------|---------------------------------------------------------------------------------------------------------------------------|
| Empirical formula                                 | $C_{10}H_{10}F_3NO_2S$                                                                                                    |
| Temperature                                       | 293(2) K                                                                                                                  |
| Wavelength                                        | 1.54178 Å                                                                                                                 |
| Unit cell dimensions                              | a = 13.1954(9) Å      alpha = 90.00 °<br>b = 10.2798(9) Å      beta = 96.658(7) °<br>c = 8.7100(8) Å      gamma = 90.00 ° |
| Volume                                            | 1173.51(17) Å <sup>3</sup>                                                                                                |
| Z                                                 | 4                                                                                                                         |
| Calculated density                                | 1.501 mg/mm <sup>3</sup>                                                                                                  |
| Absorption coefficient                            | 0.304 mm <sup>-1</sup>                                                                                                    |
| F(000)                                            | 544.0                                                                                                                     |
| Crystal size                                      | 0.24 × 0.15 × 0.07 mm <sup>3</sup>                                                                                        |
| Theta range for data collection                   | 6.64 to 58.52°                                                                                                            |
| Reflections collected<br>/Independent reflections | 7805<br>/2740 [R <sub>int</sub> = 0.0276, R <sub>sigma</sub> = 0.0329]                                                    |
| Data / restraints / parameters                    | 2740 / 0 / 155                                                                                                            |
| Goodness-of-fit on F <sup>2</sup>                 | 1.051                                                                                                                     |
| Final R indices<br>[I > 2sigma(I)]                | R <sub>1</sub> = 0.0468, wR <sub>2</sub> = 0.1177                                                                         |
| Final R indices (all data)                        | R <sub>1</sub> = 0.0647, wR <sub>2</sub> = 0.1349                                                                         |

#### IV. NMR spectra copies

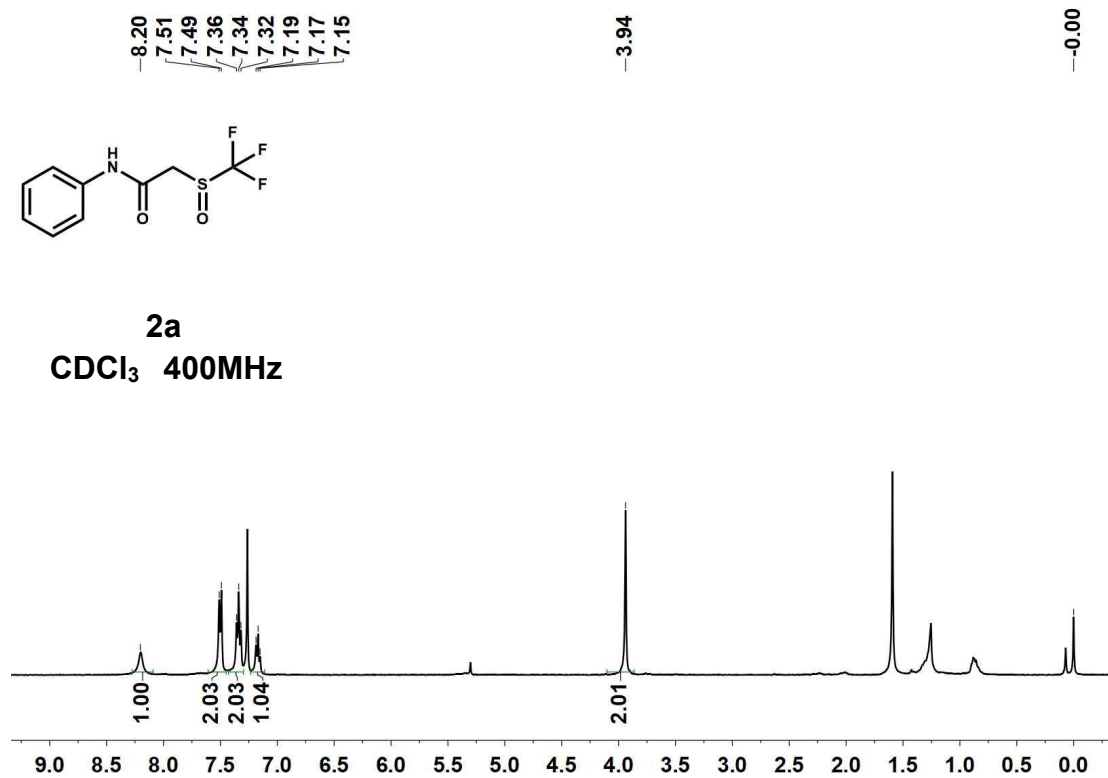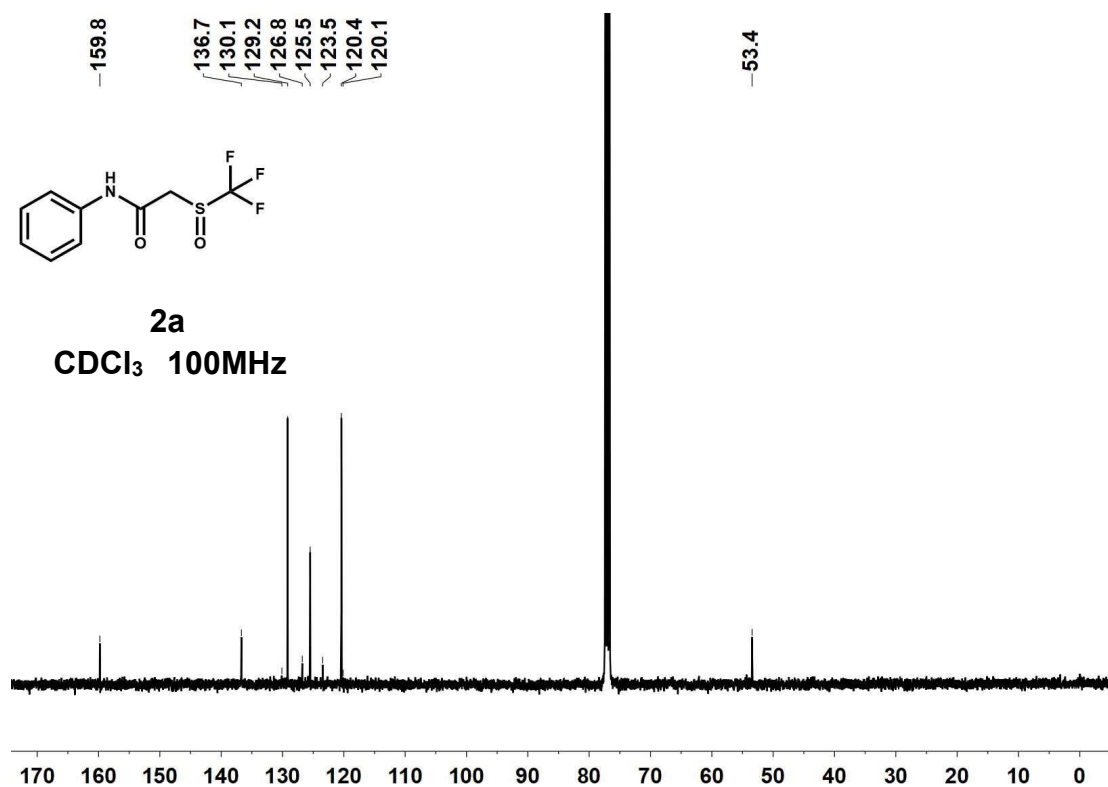

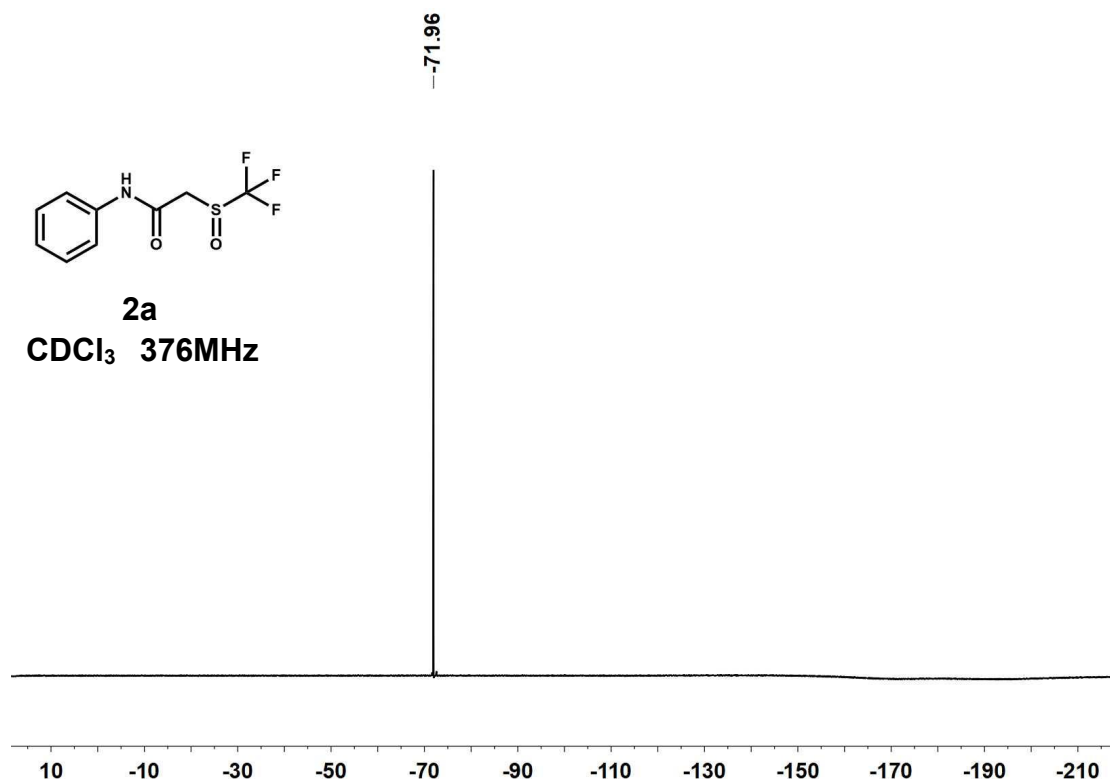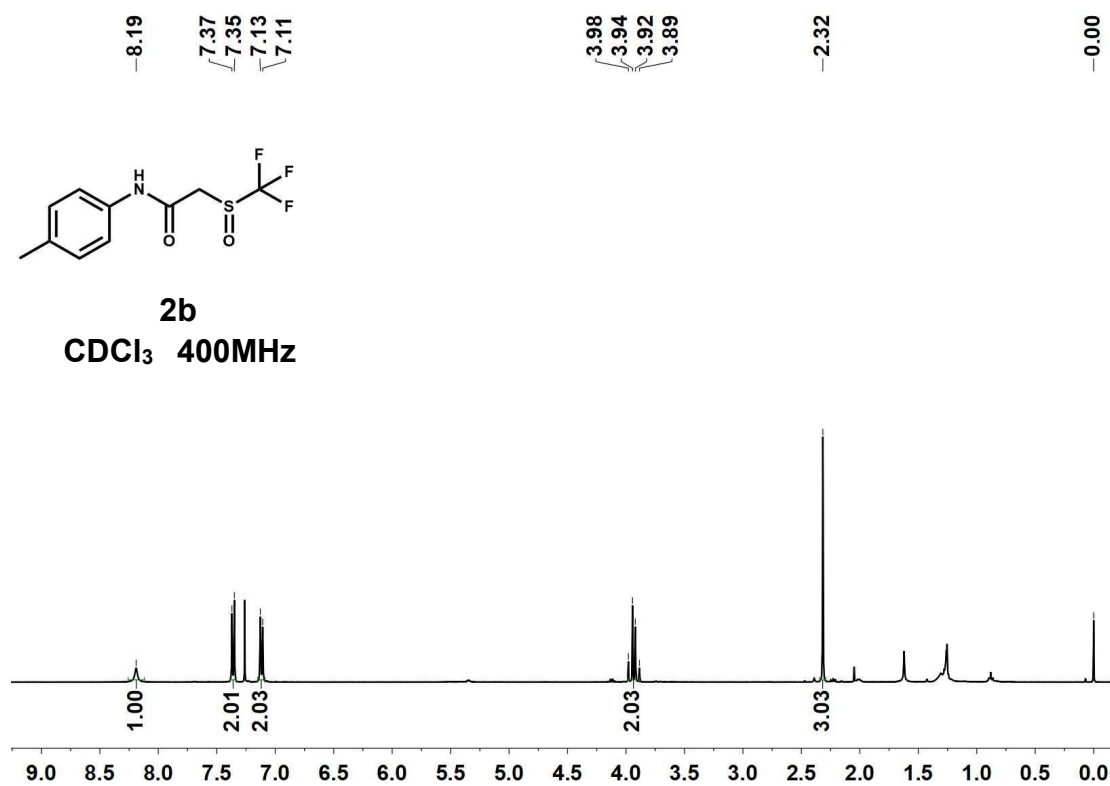



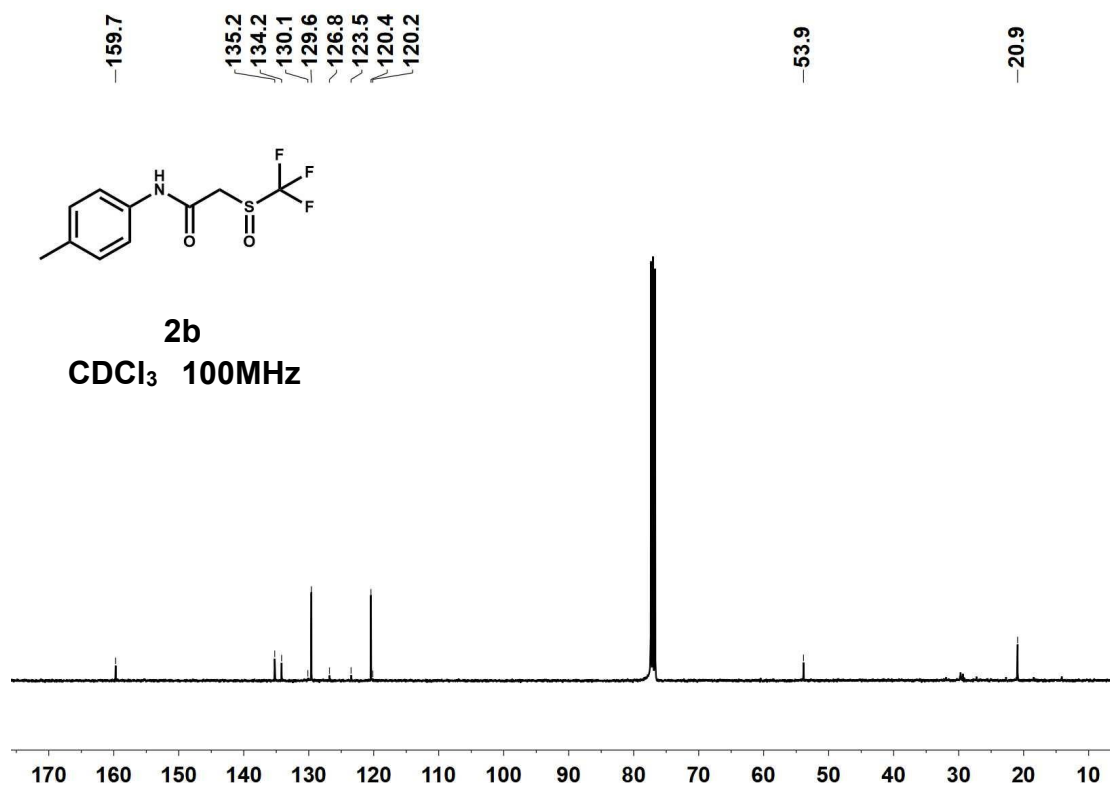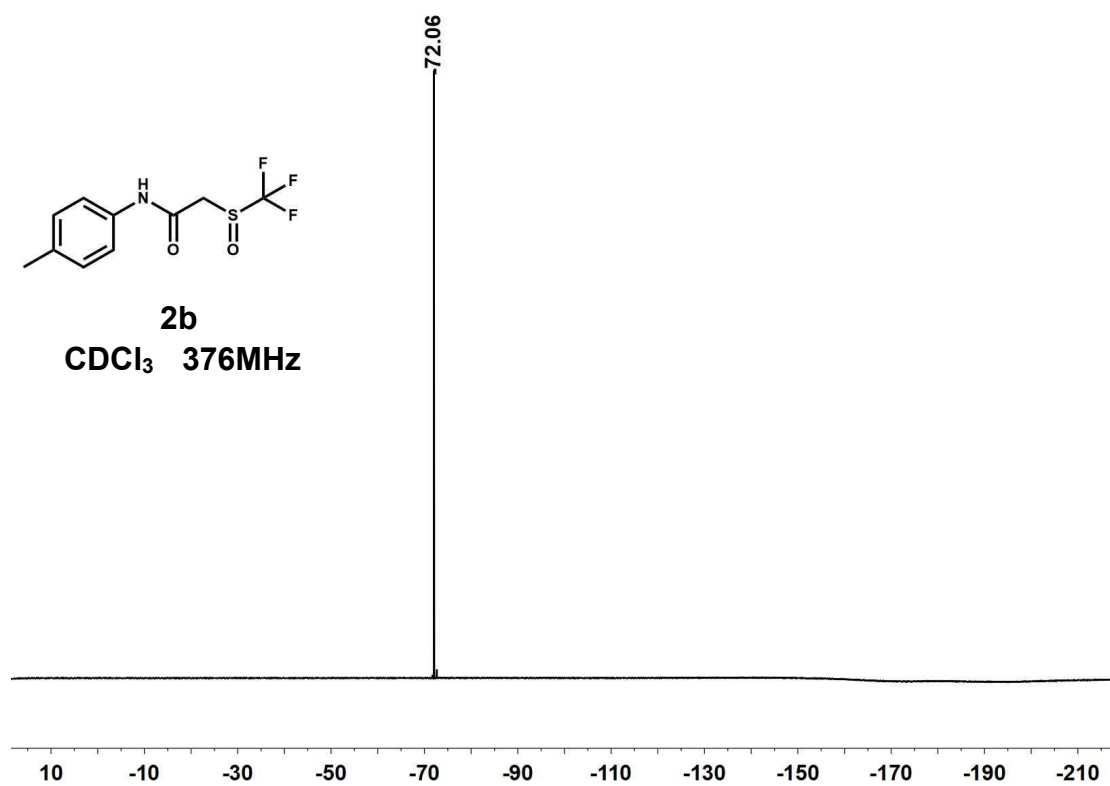

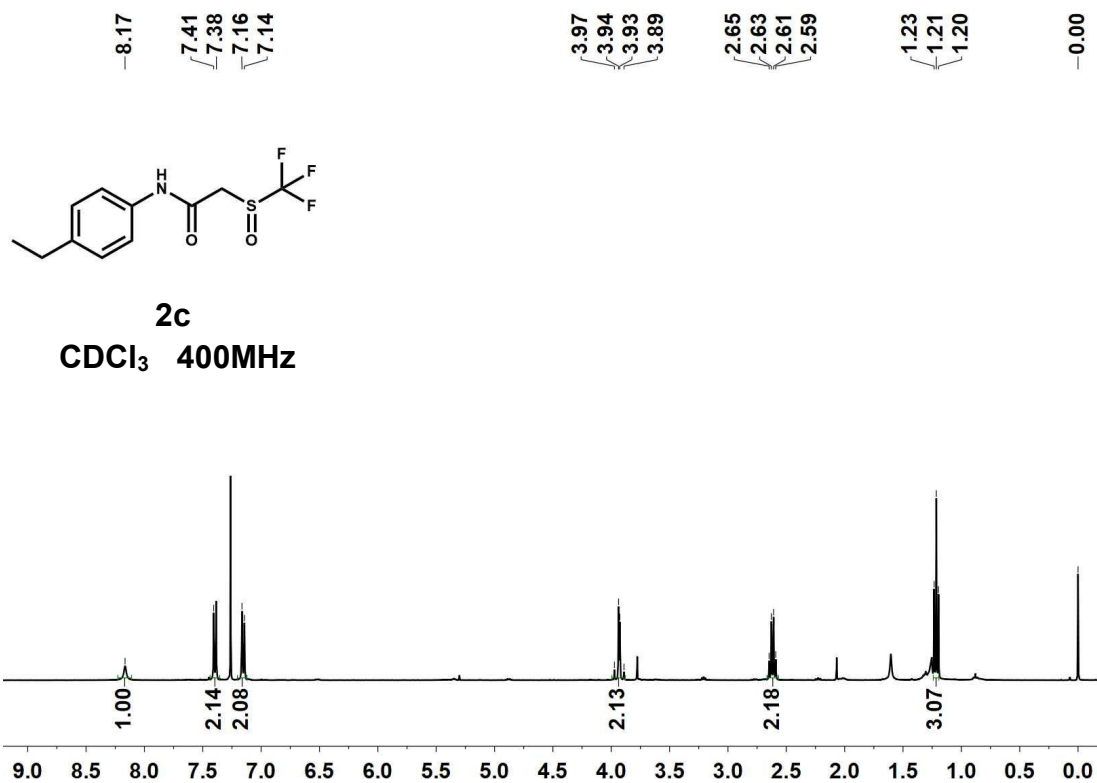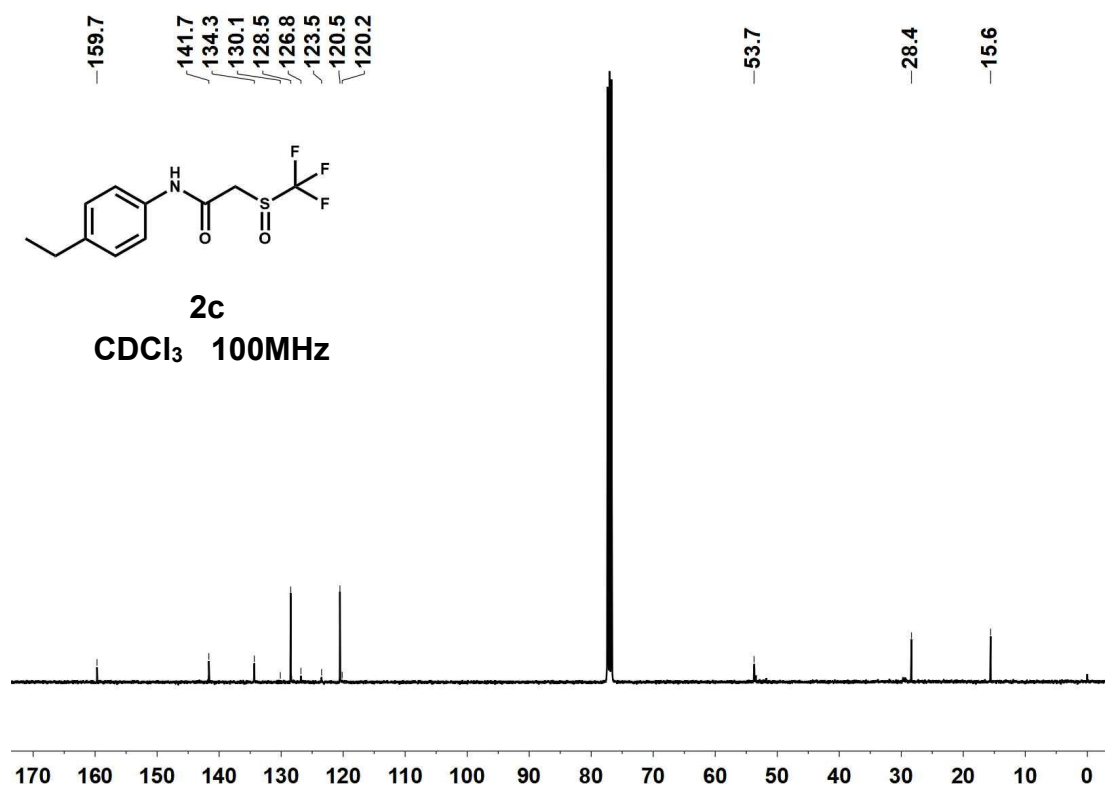

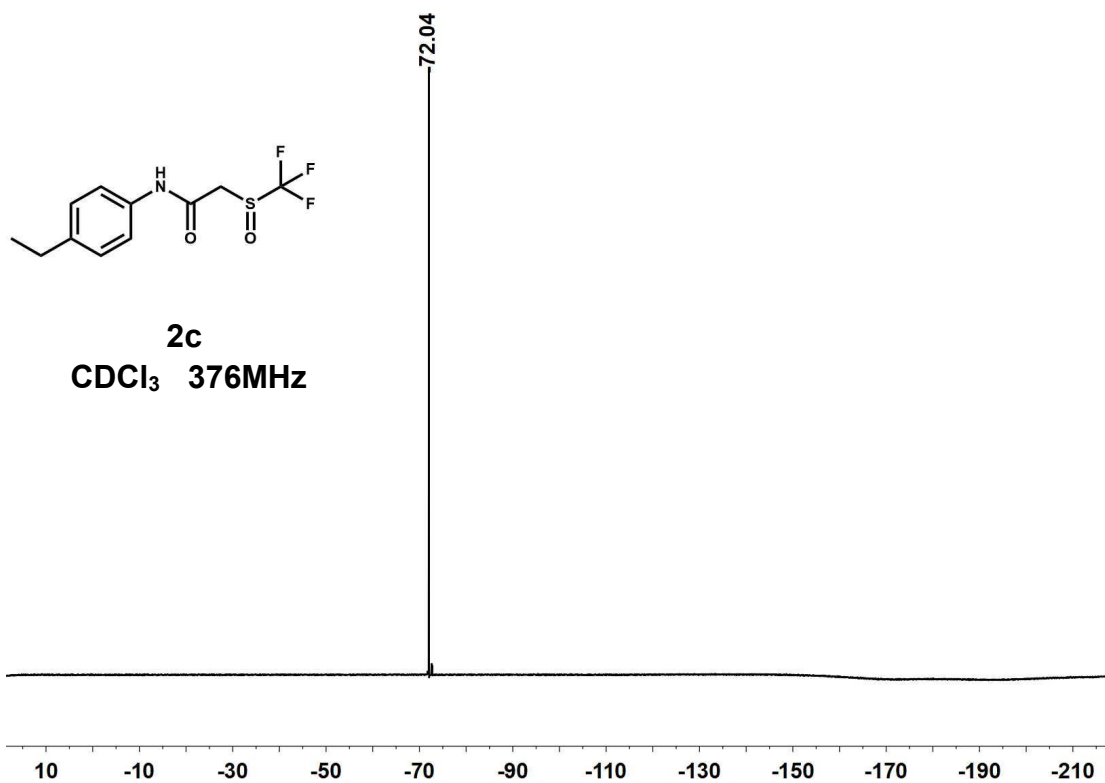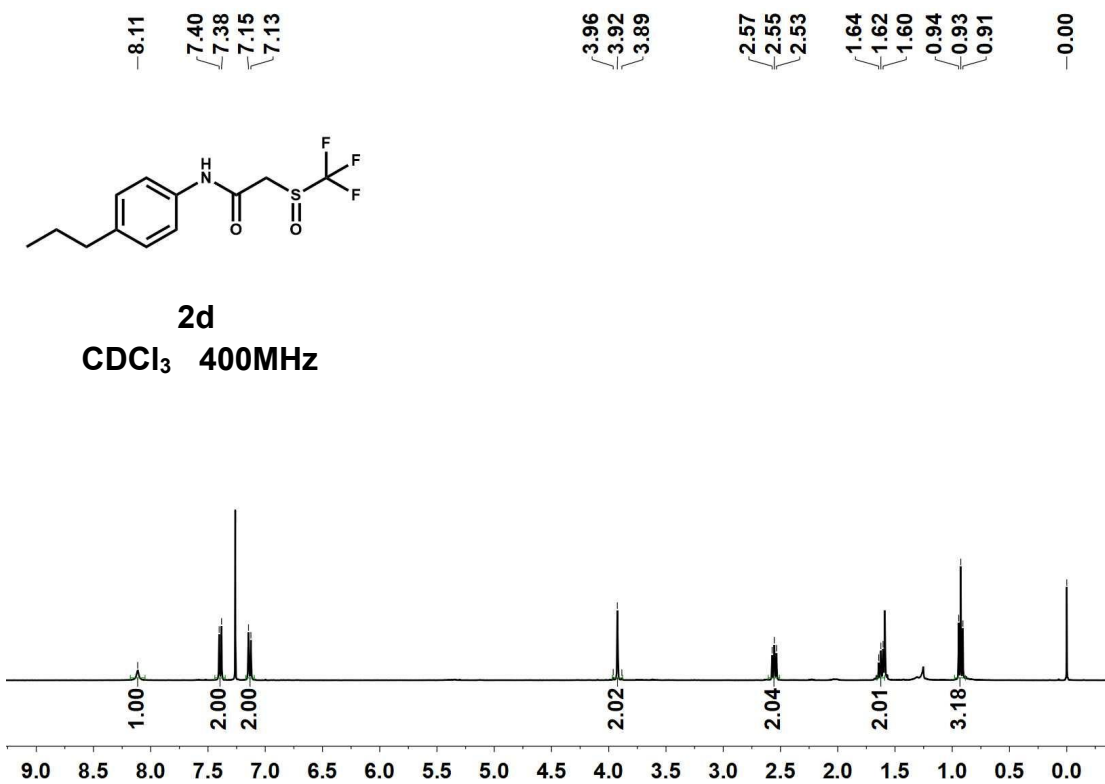

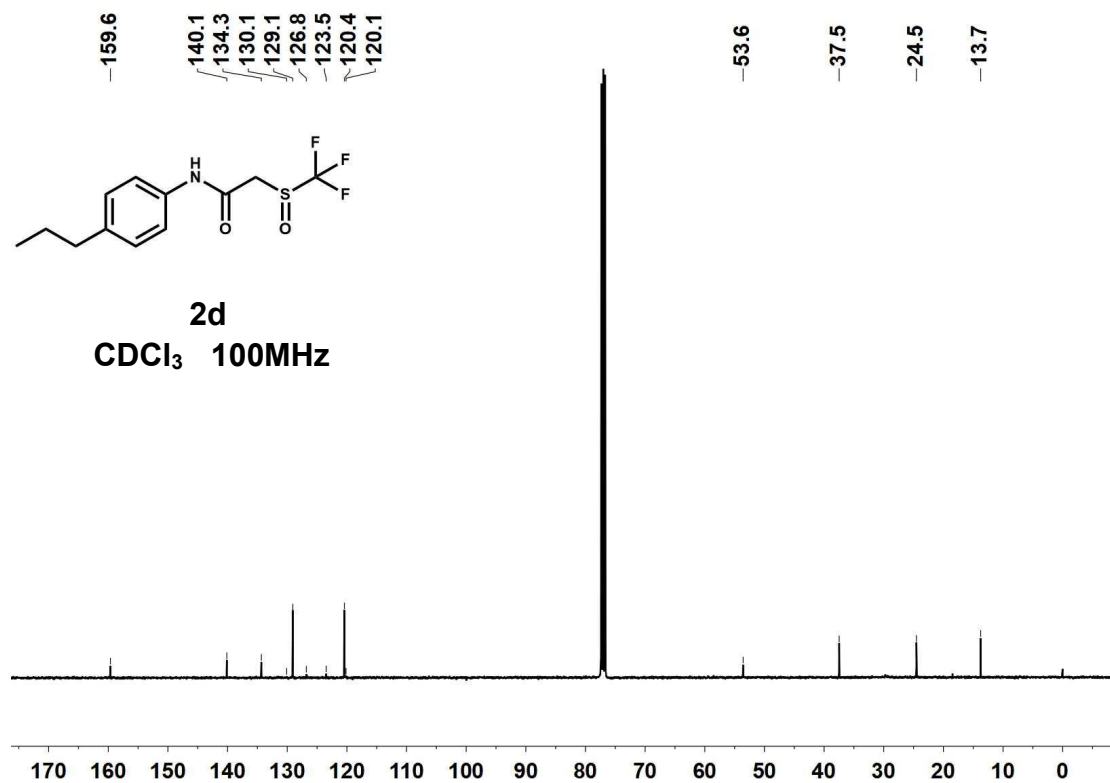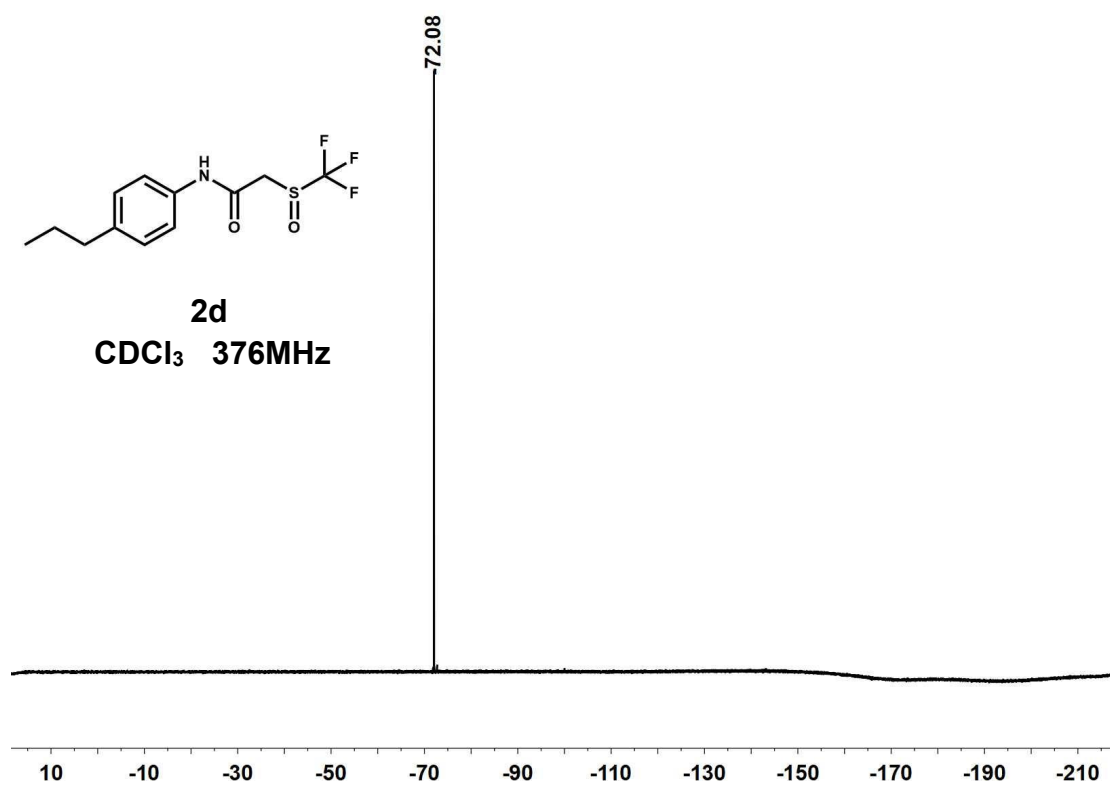

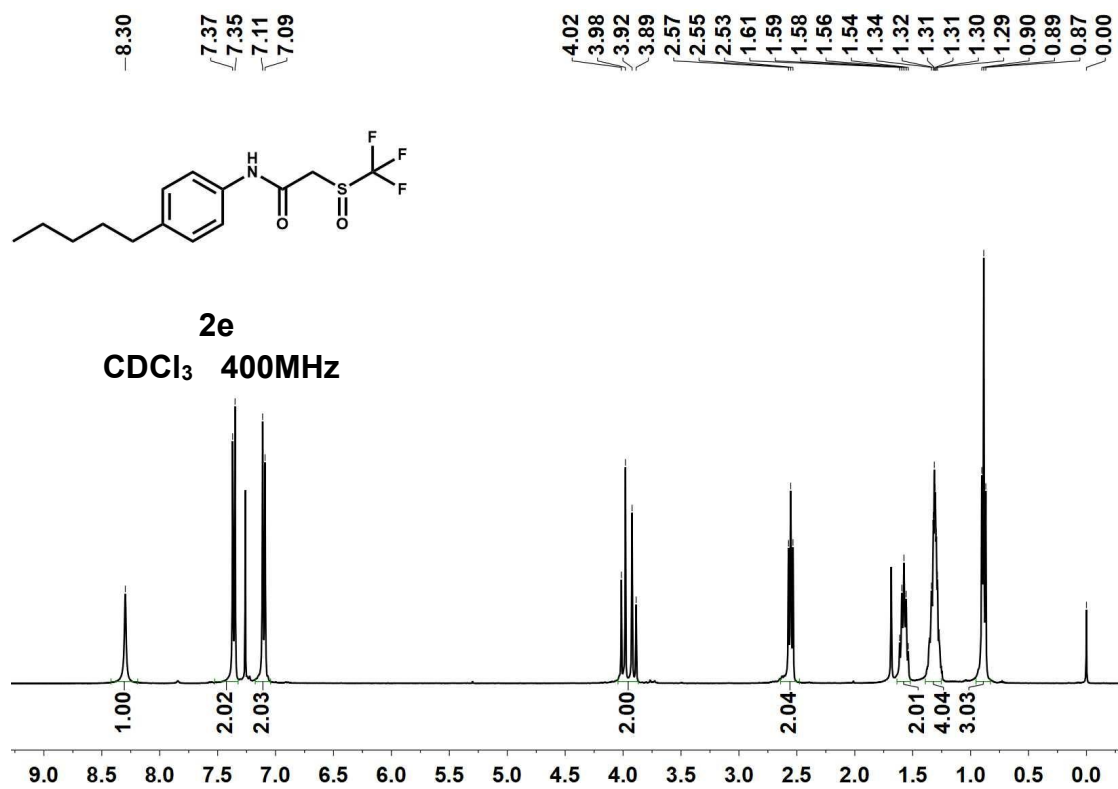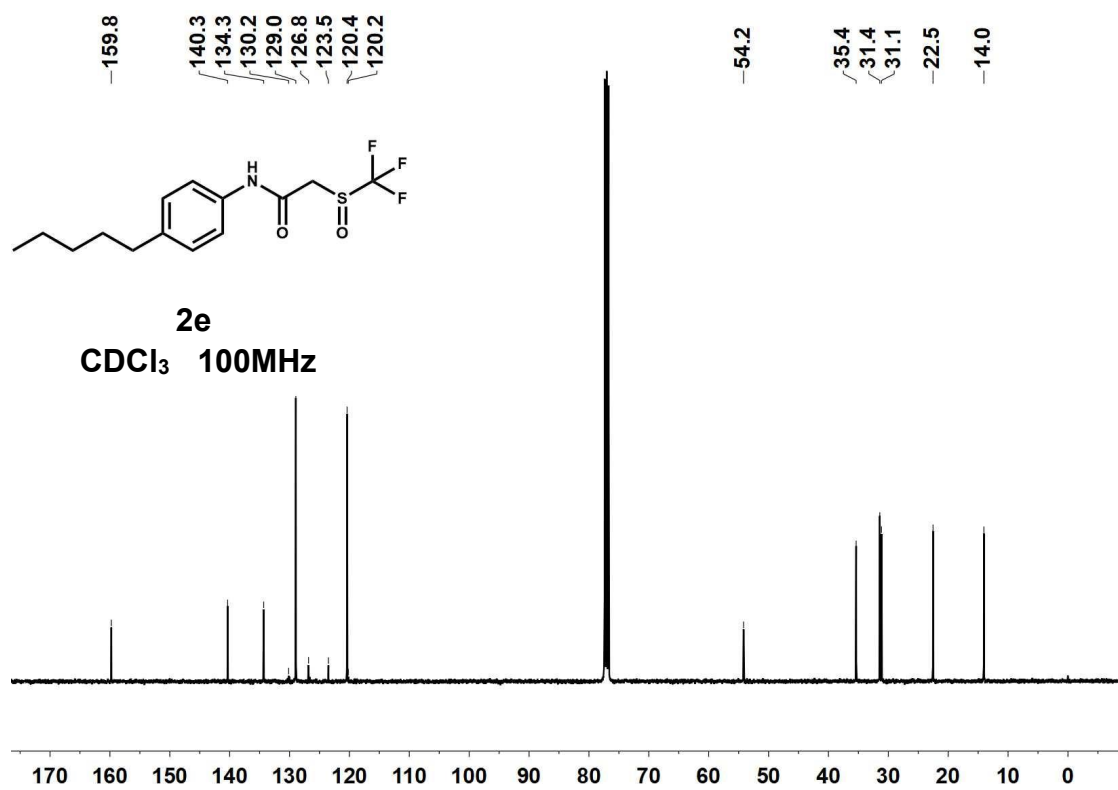

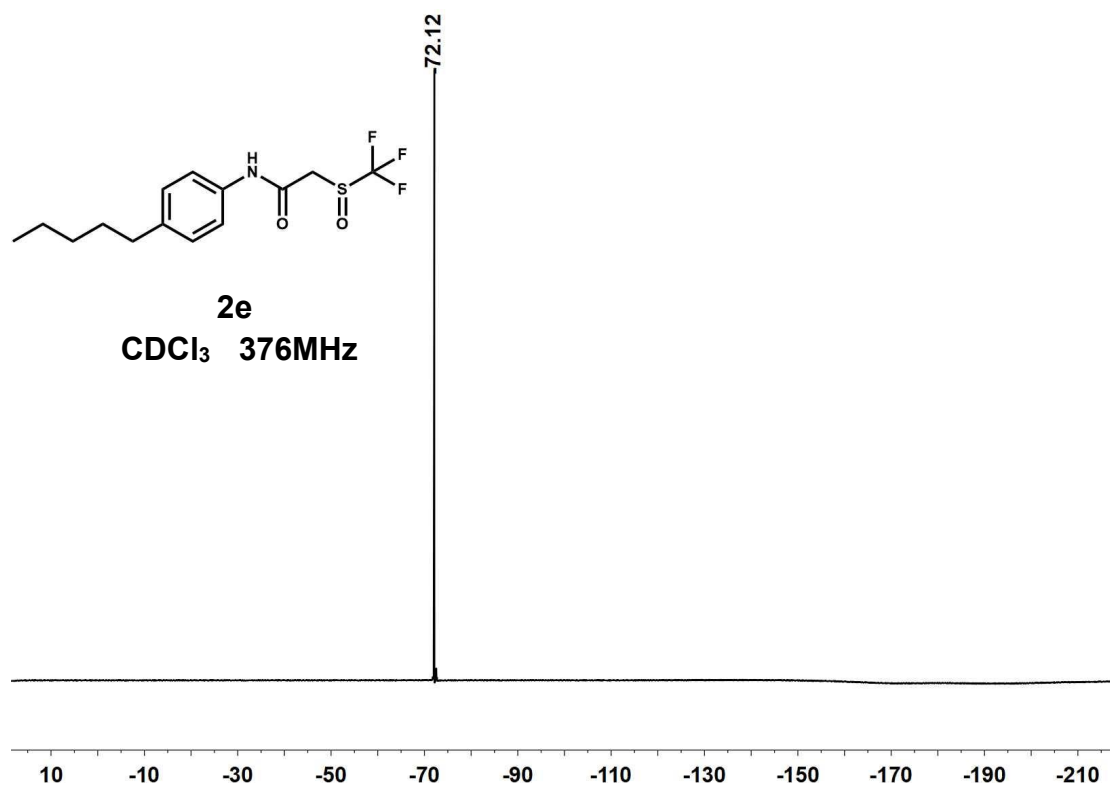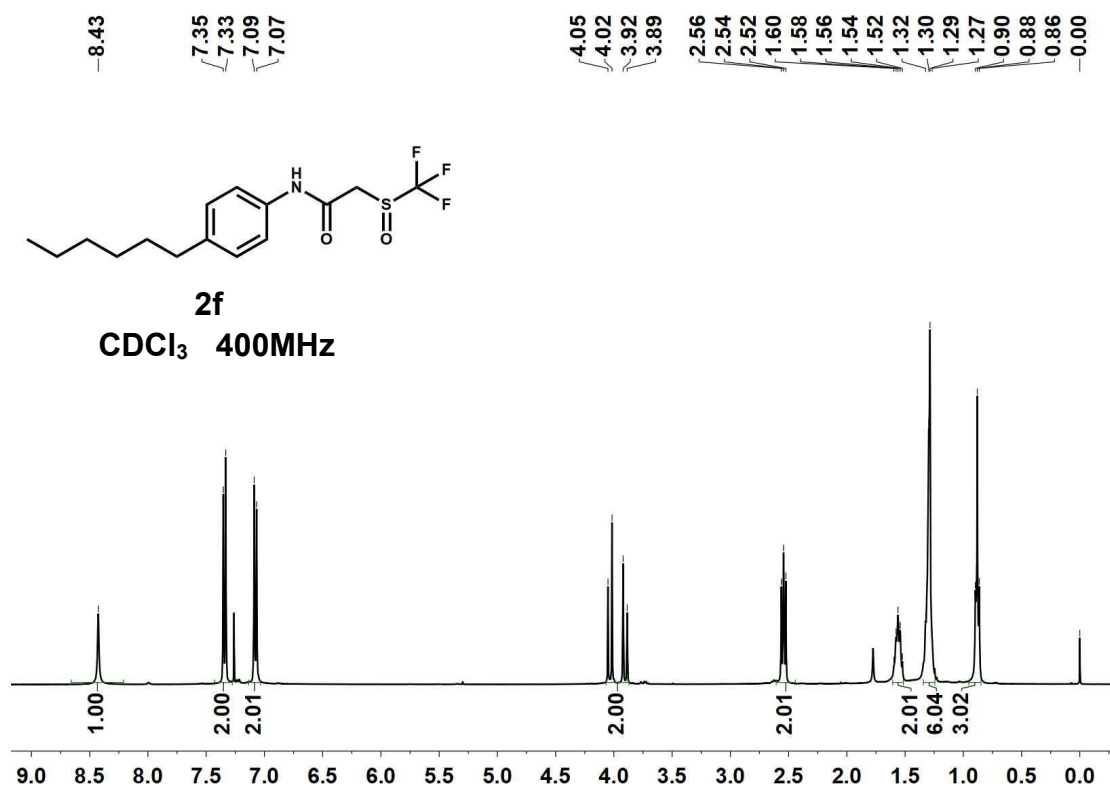

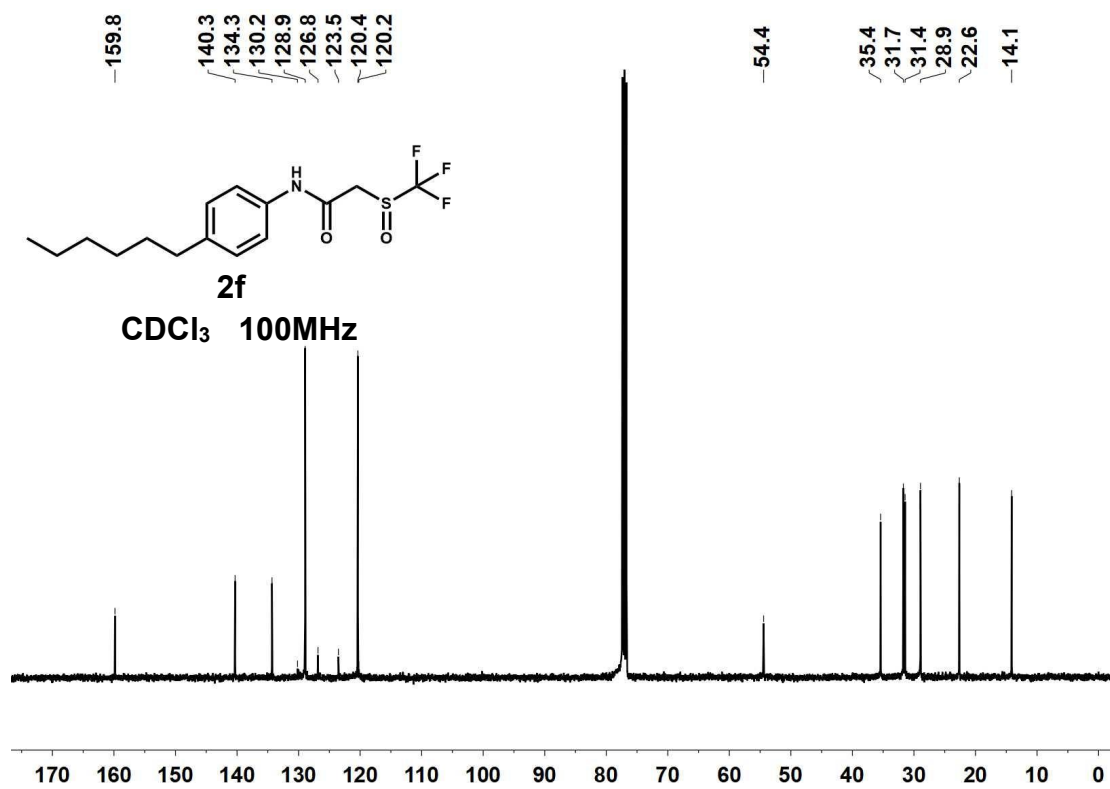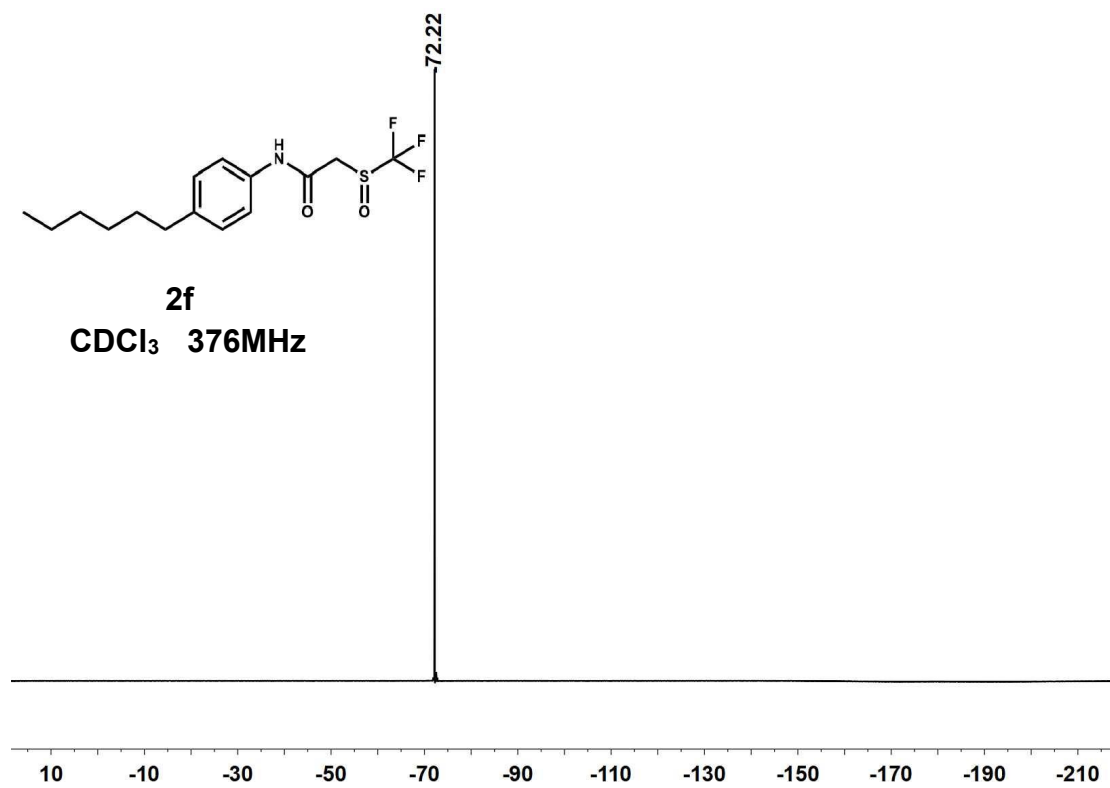

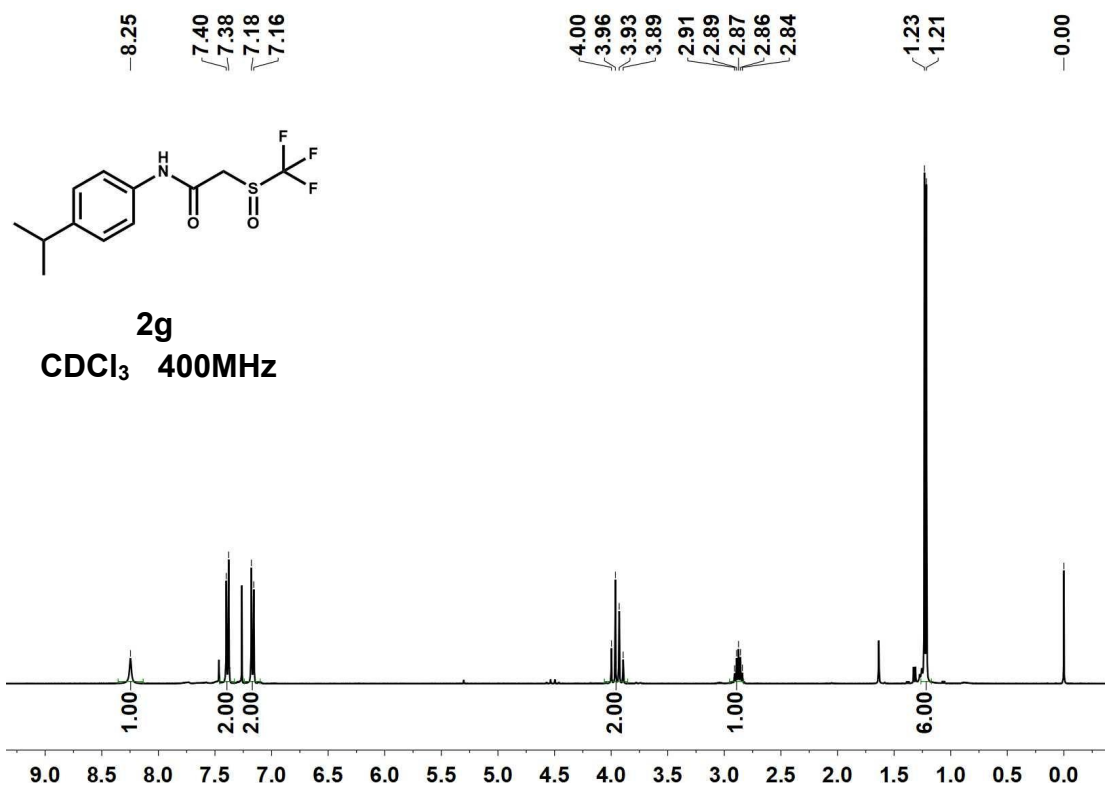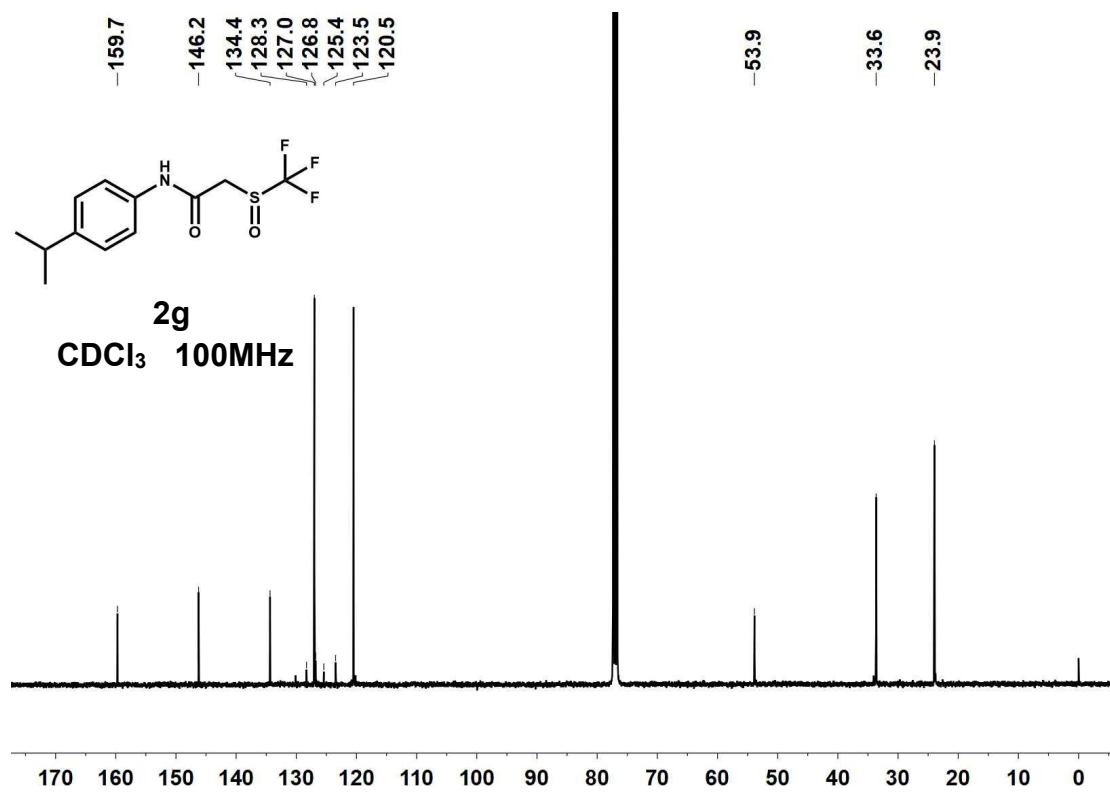



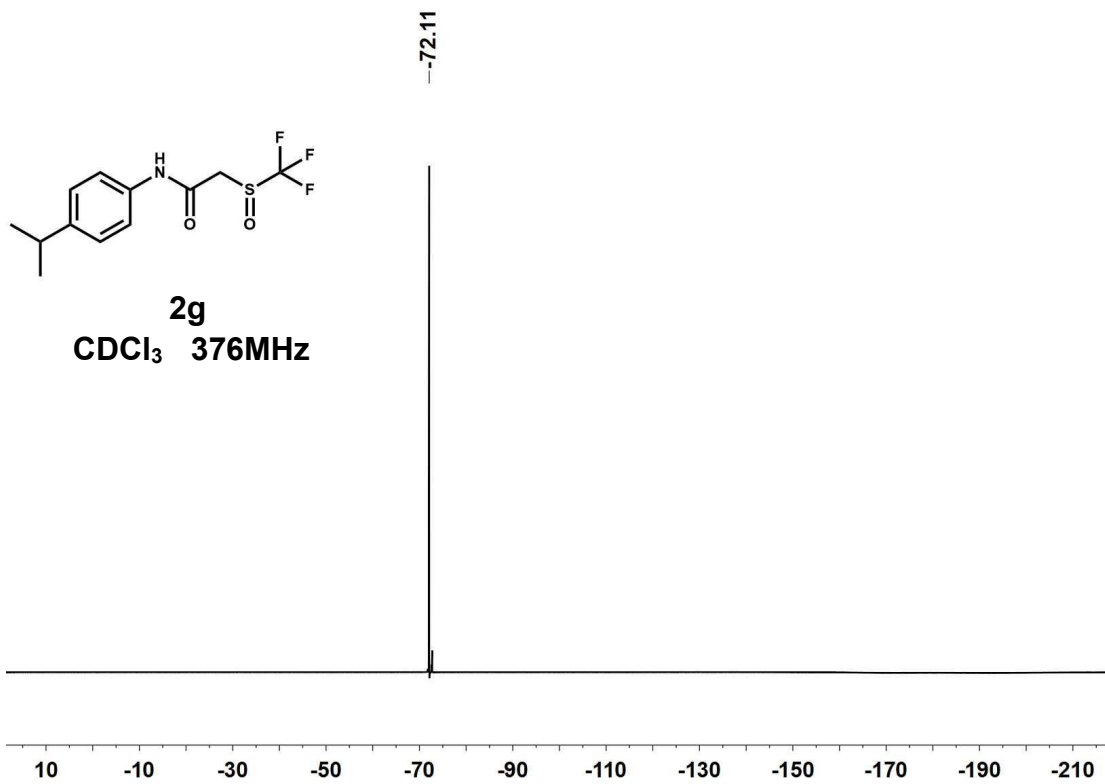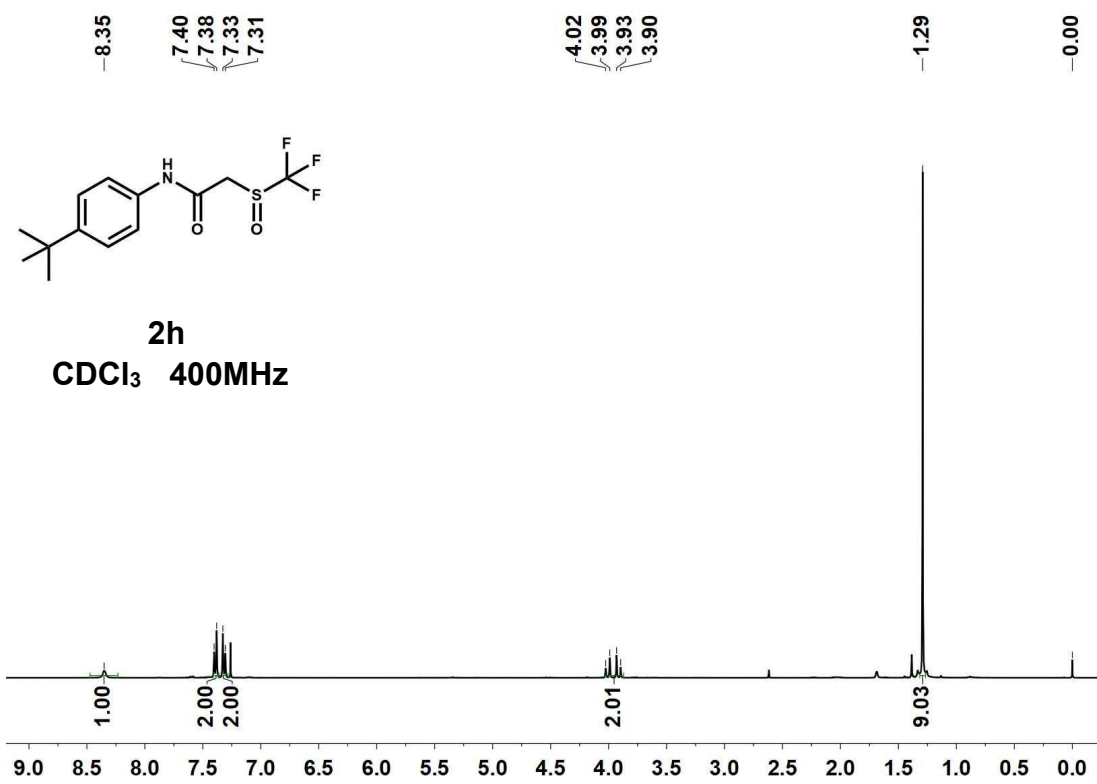

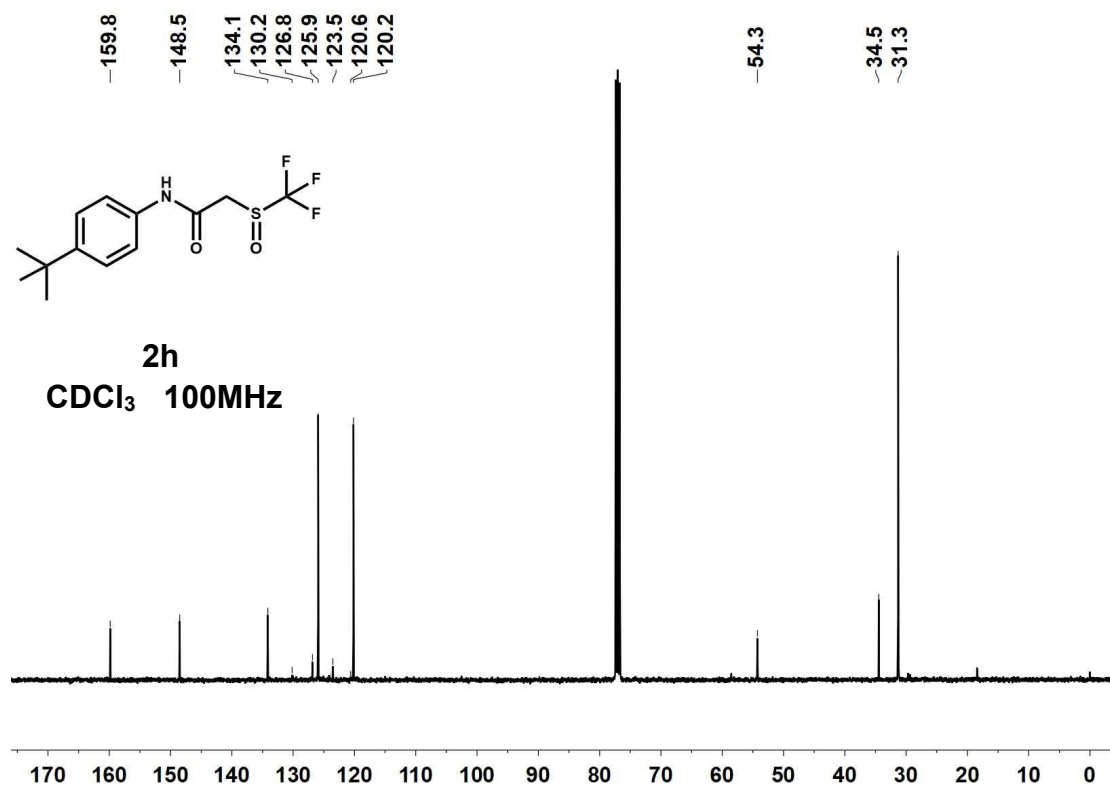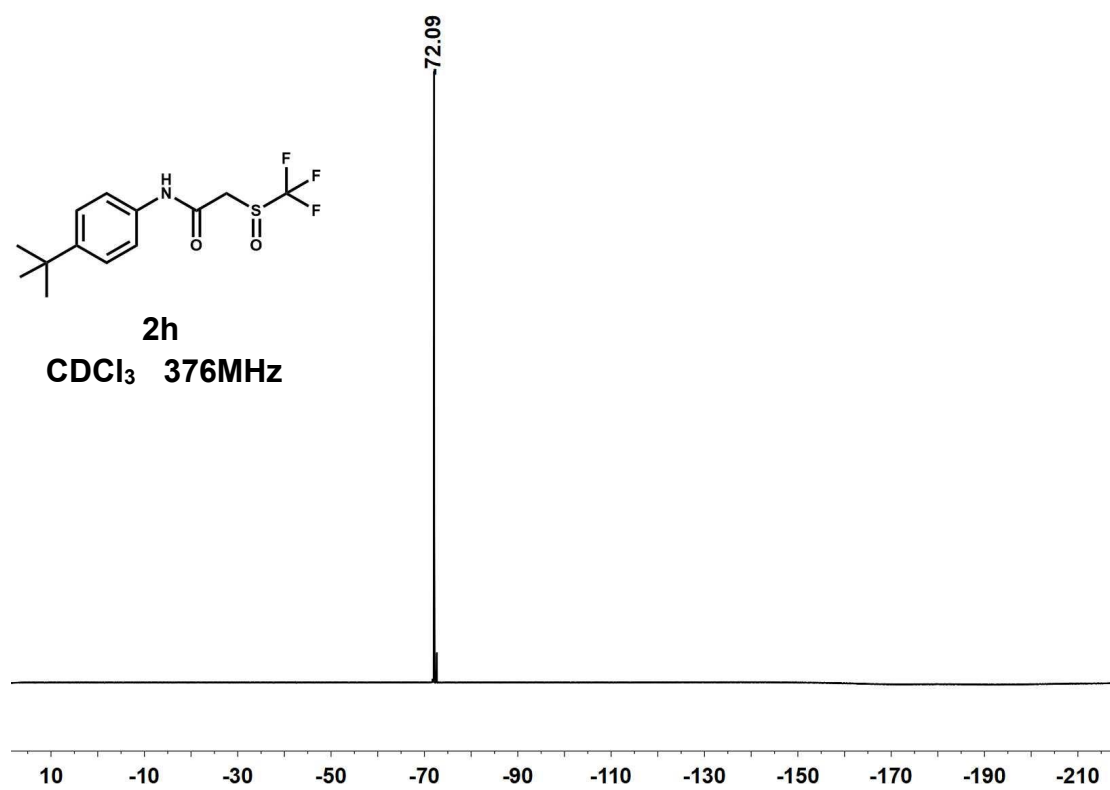

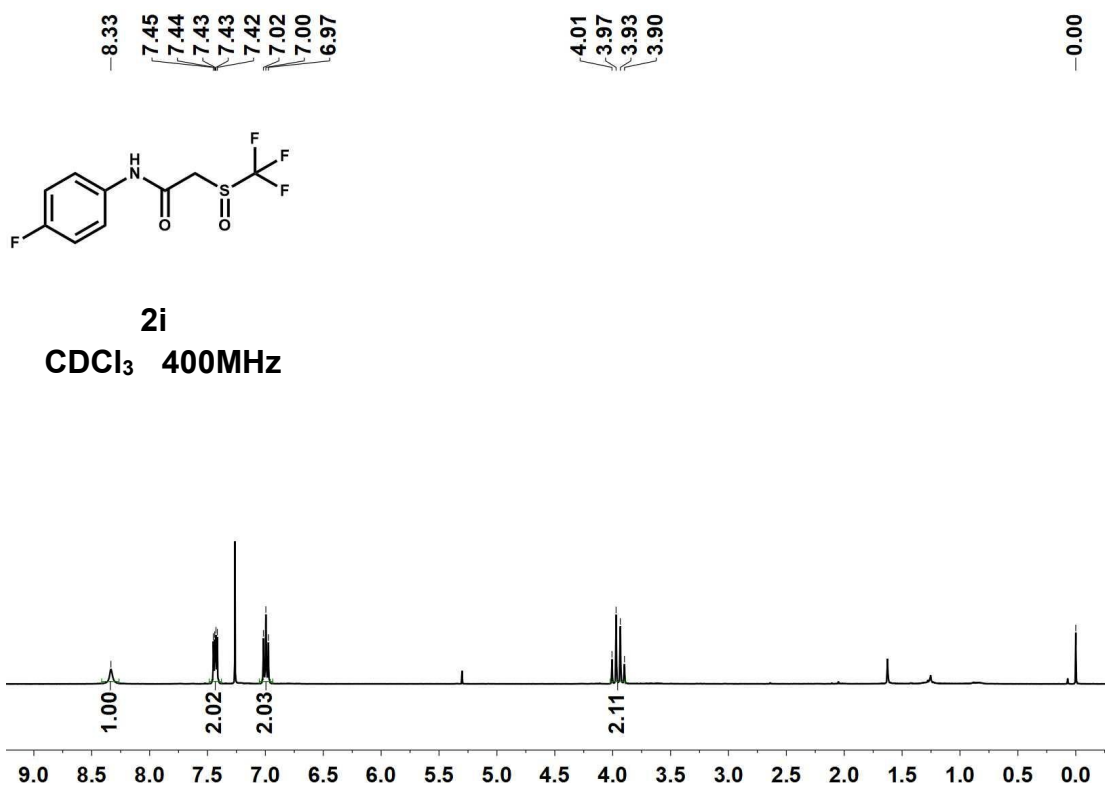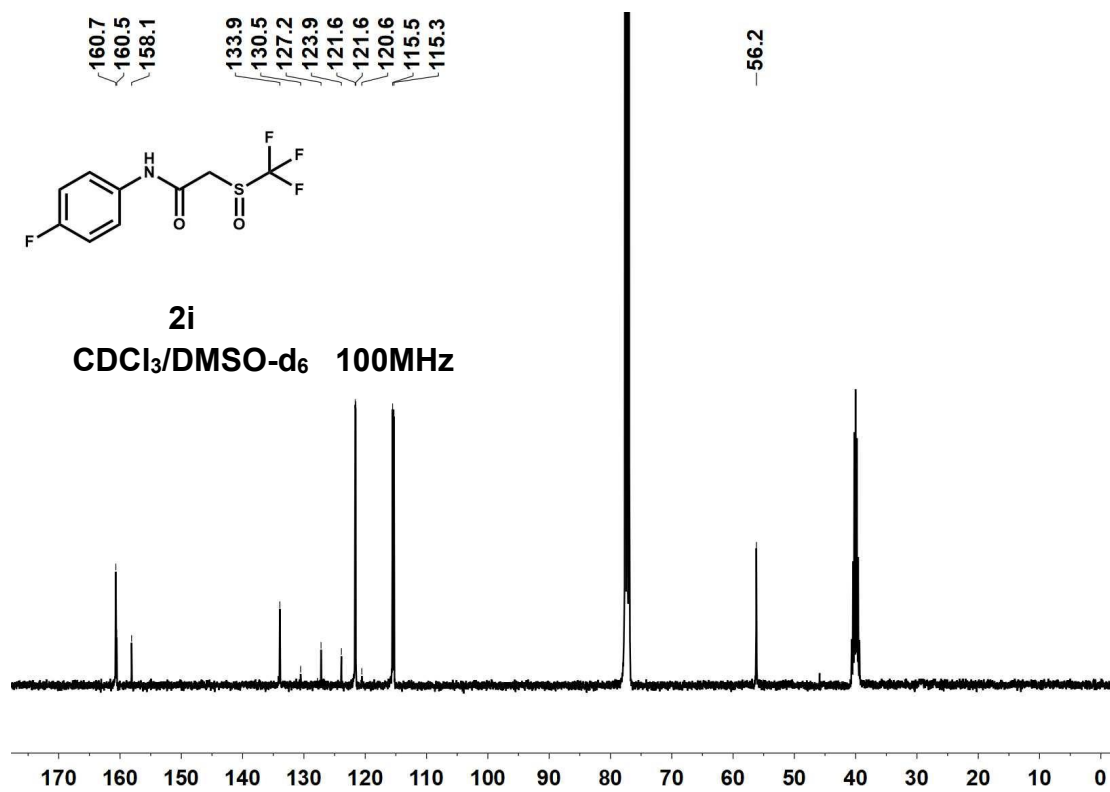

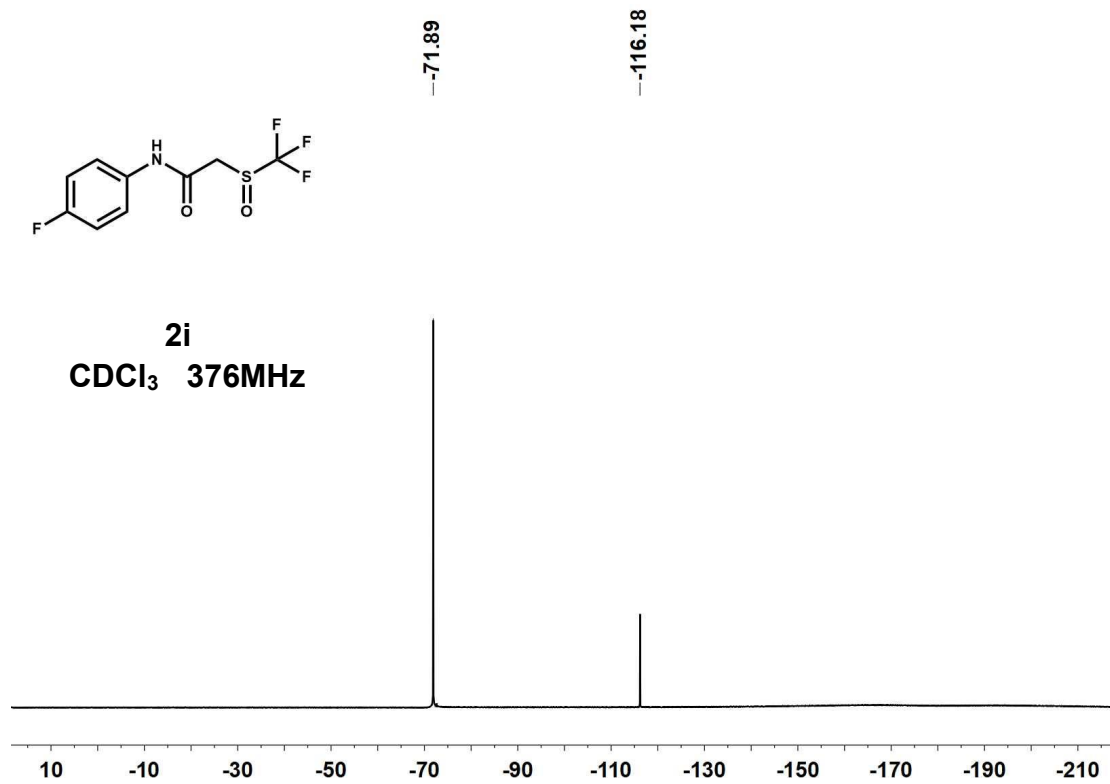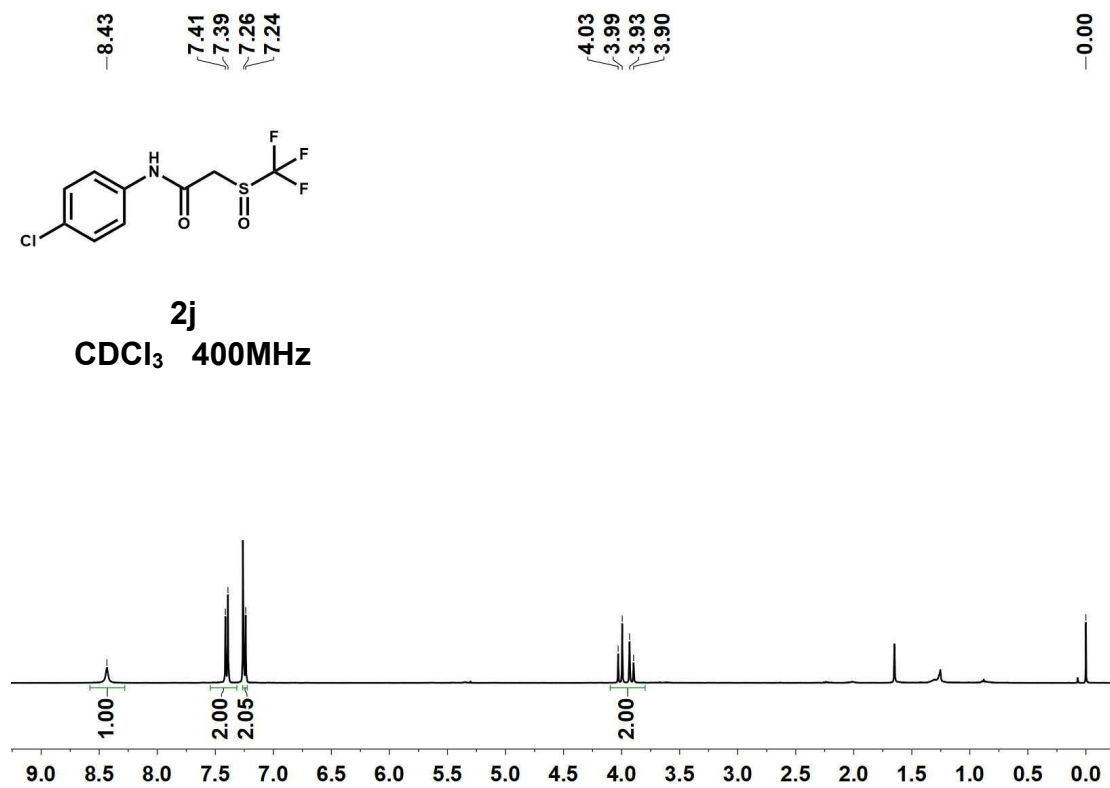

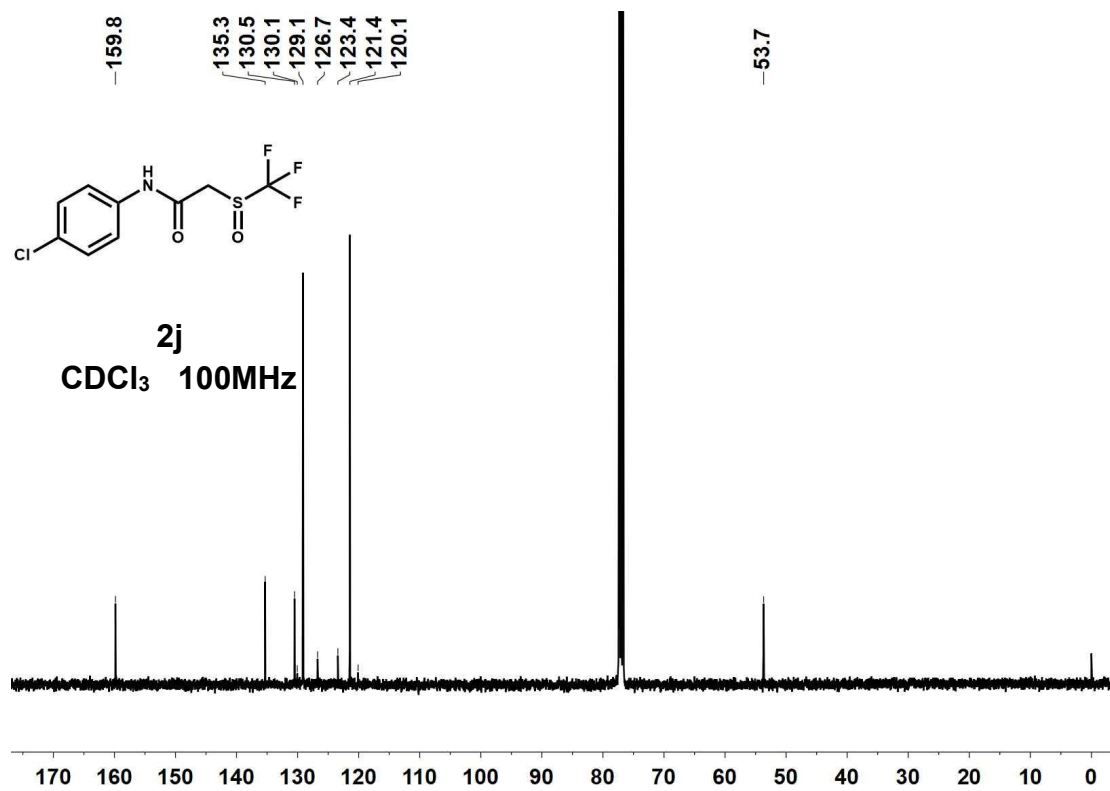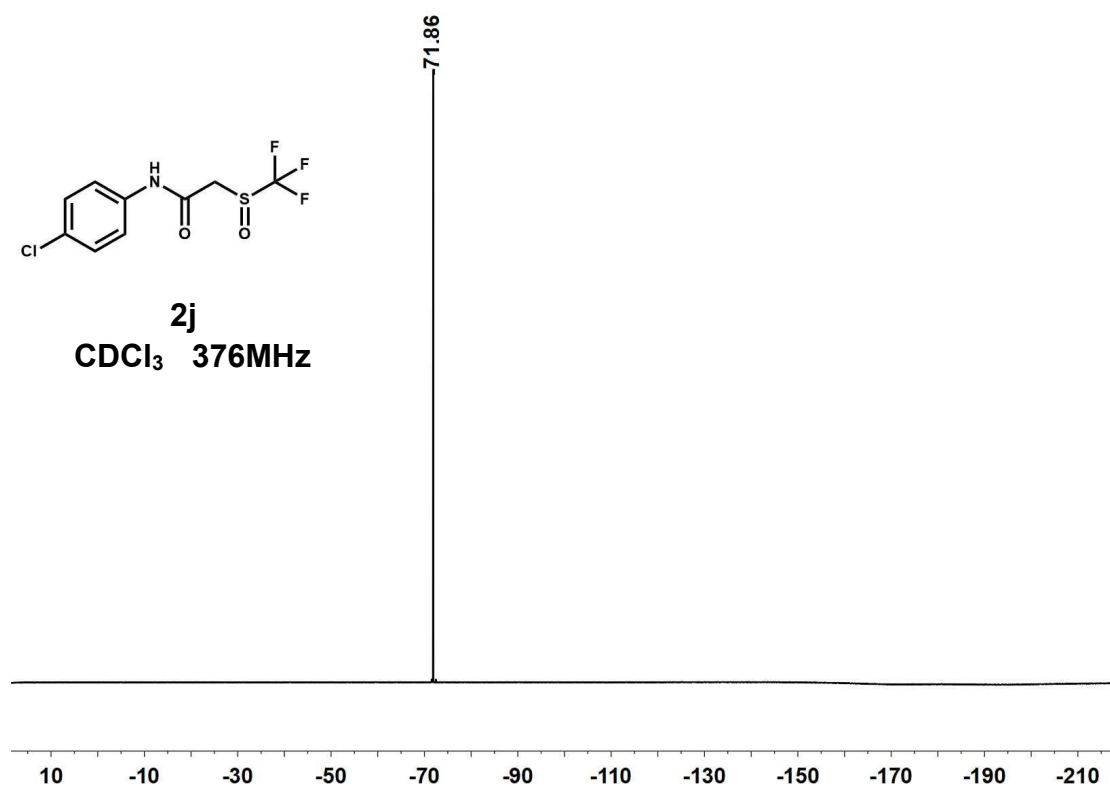

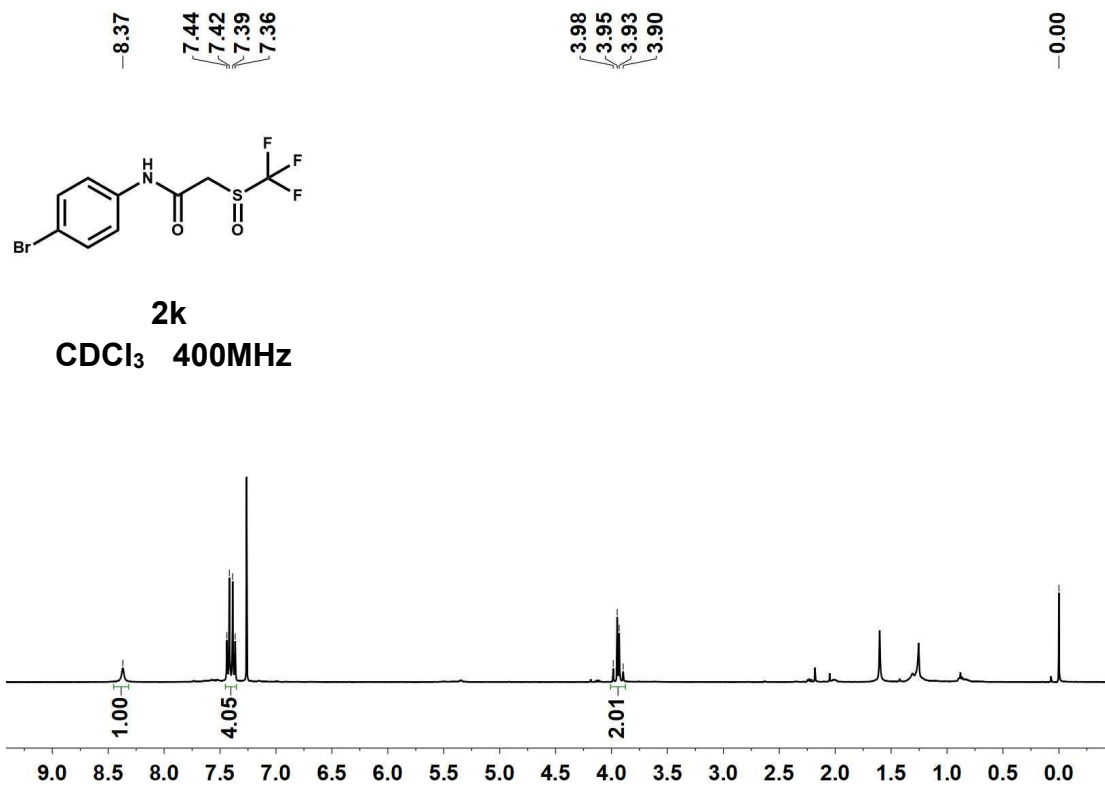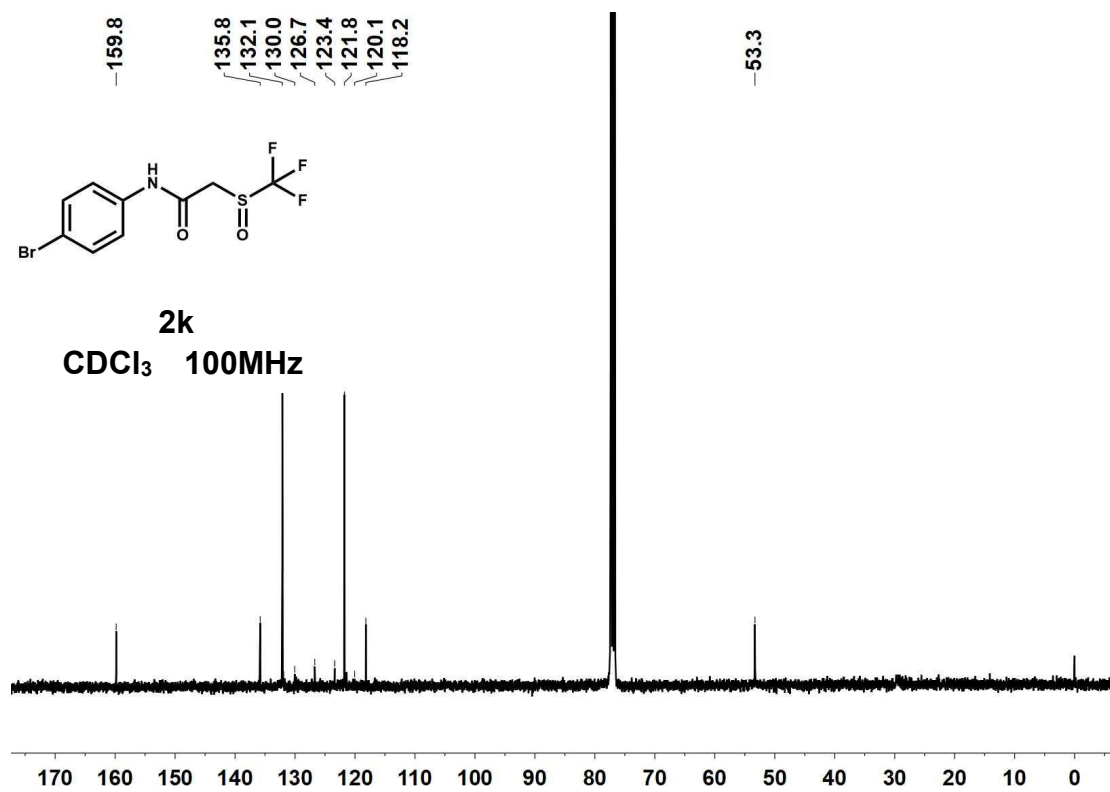

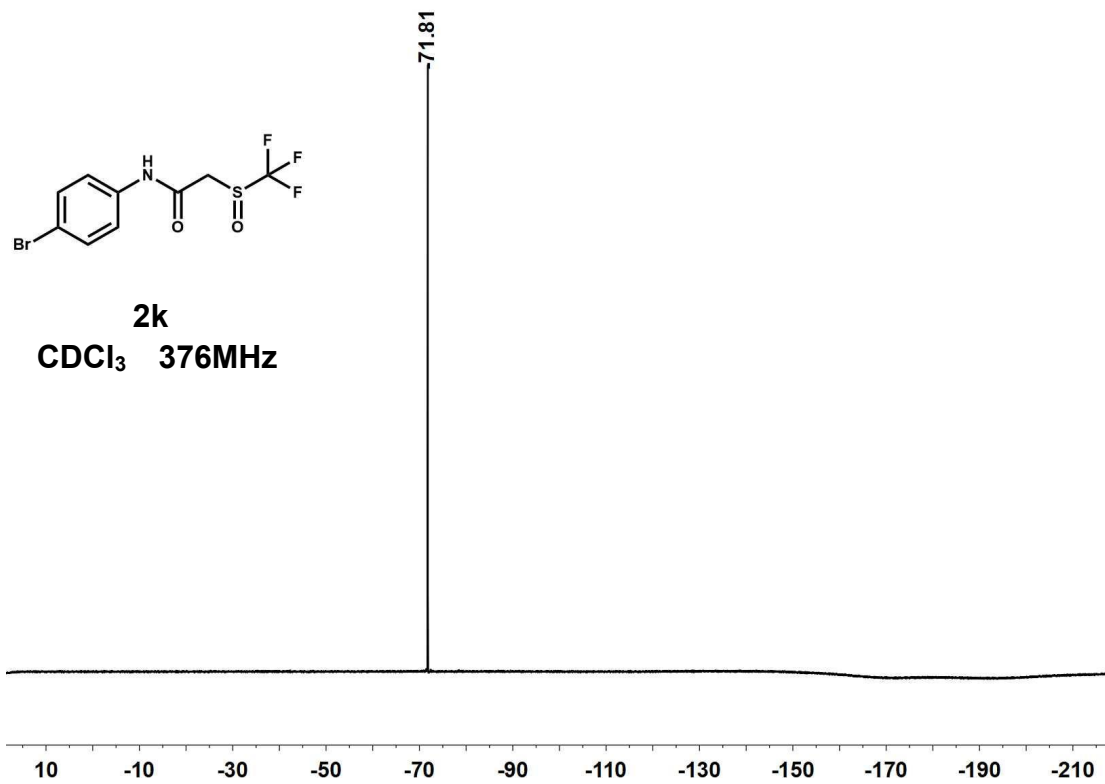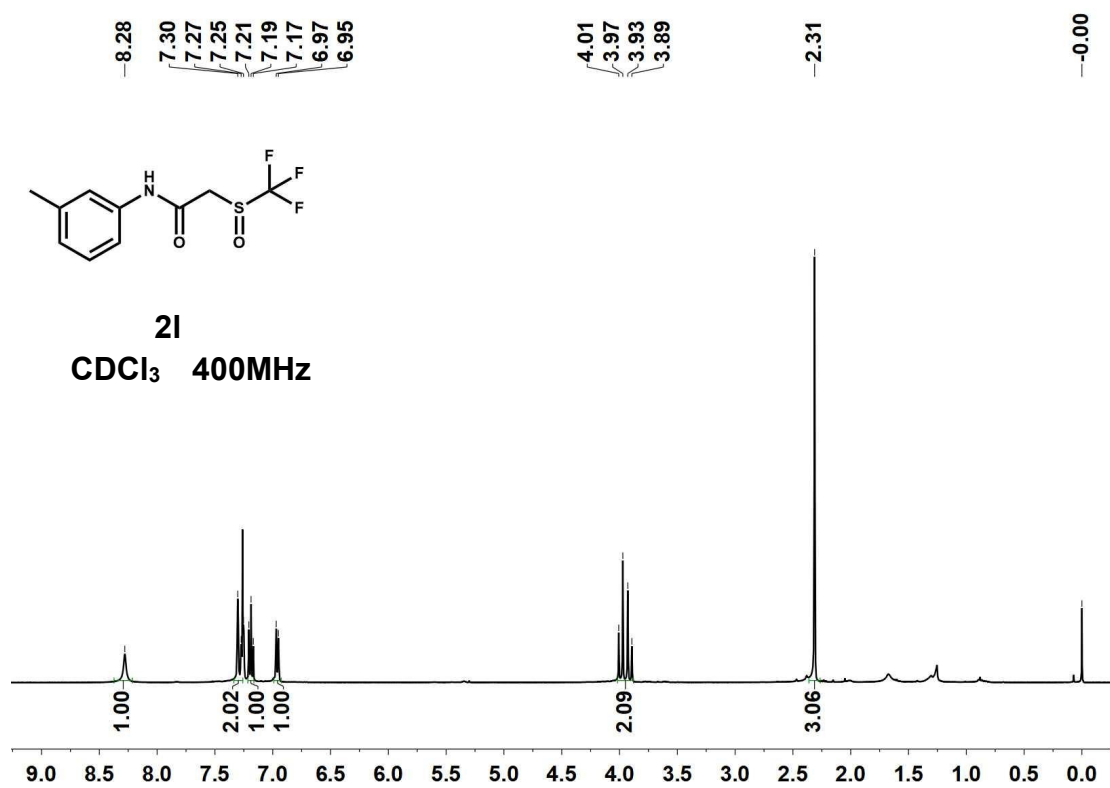

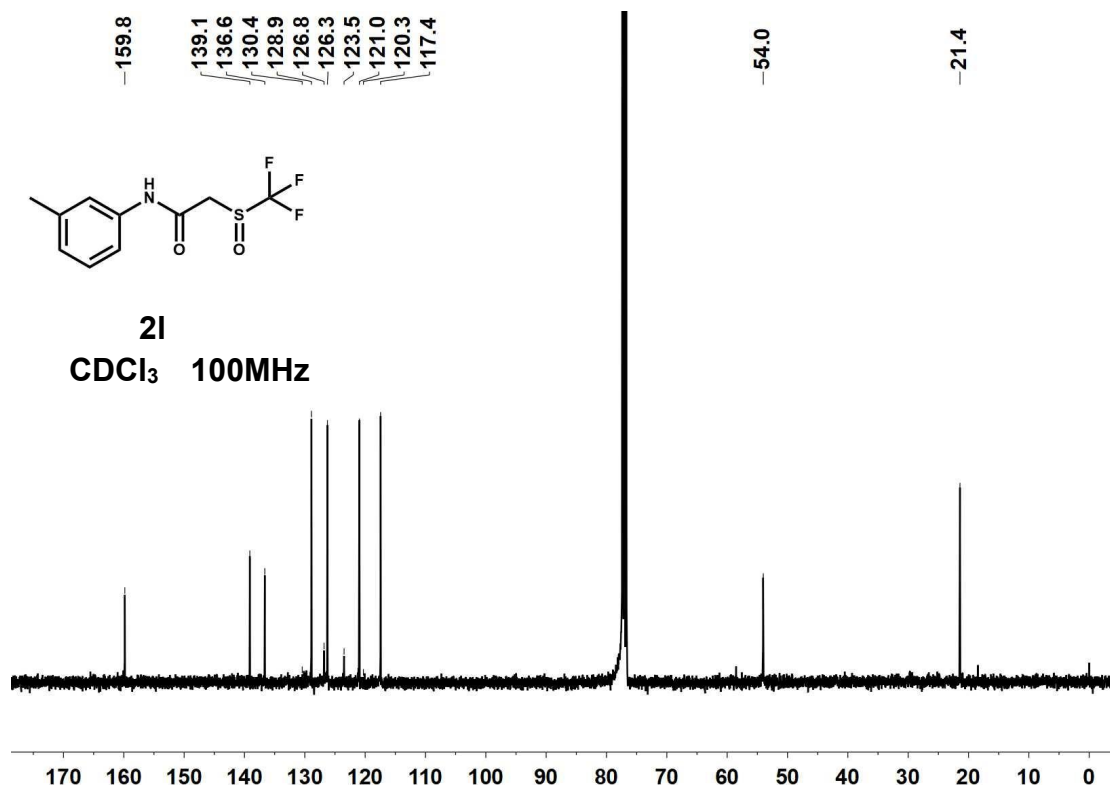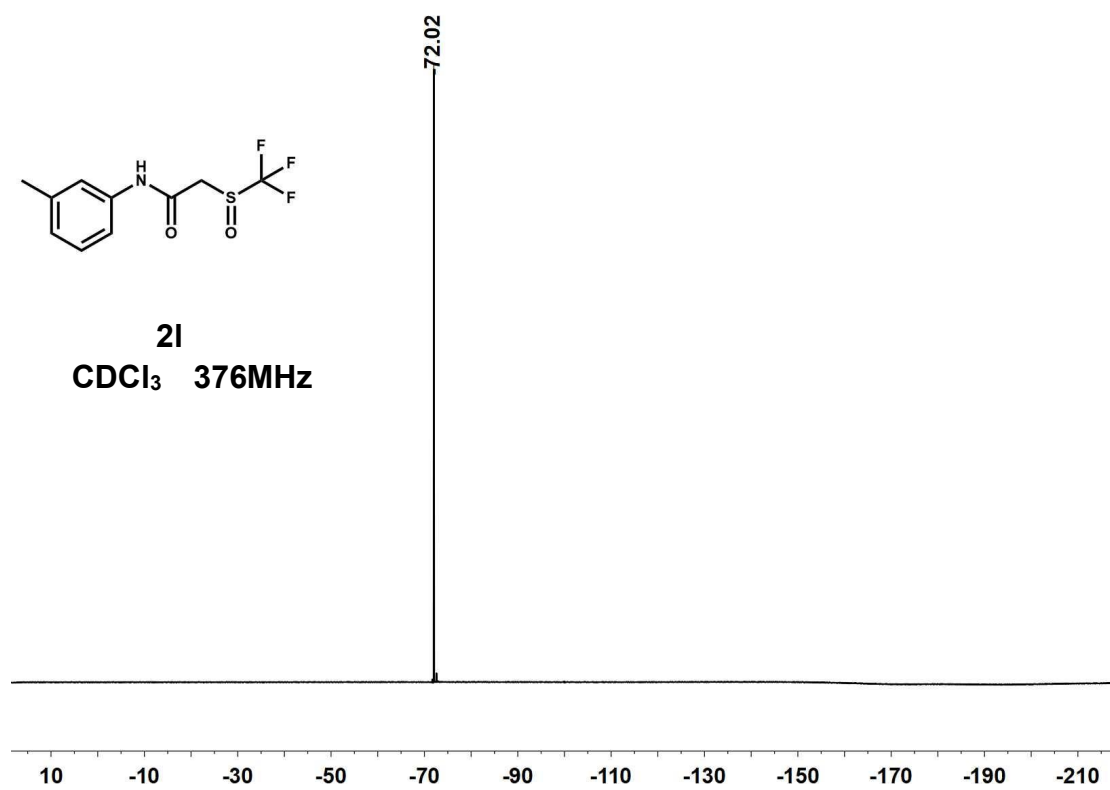



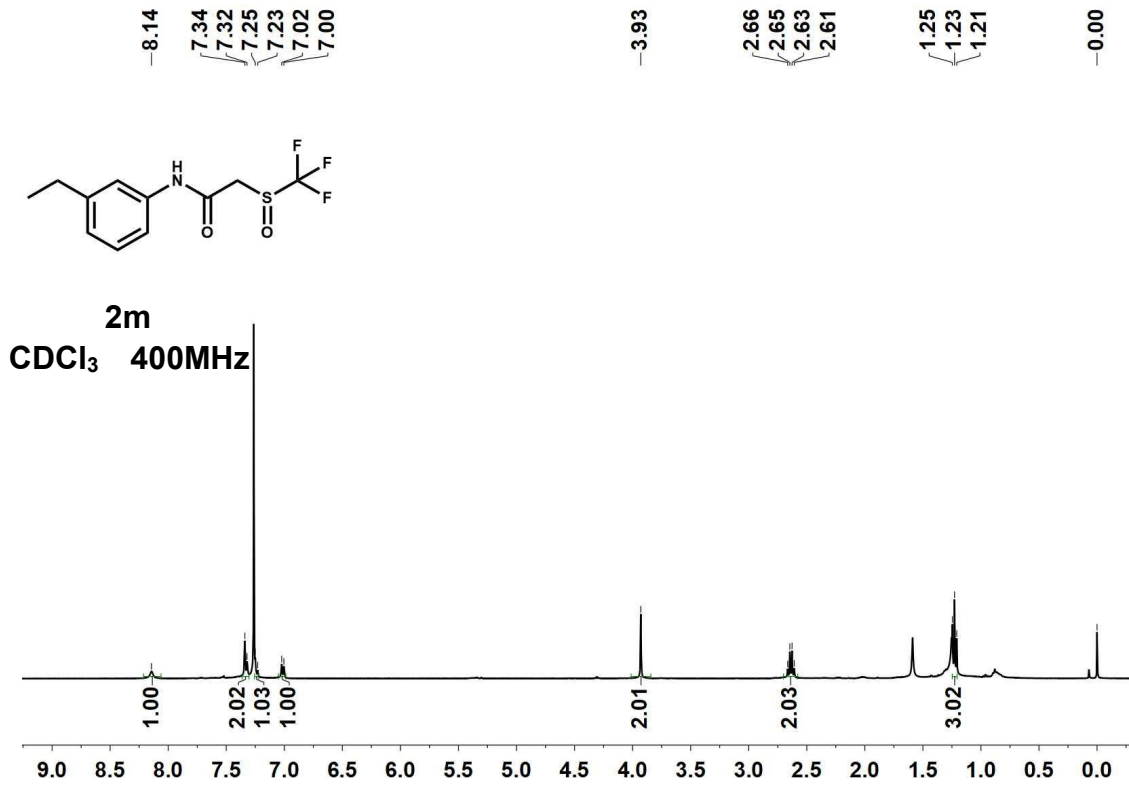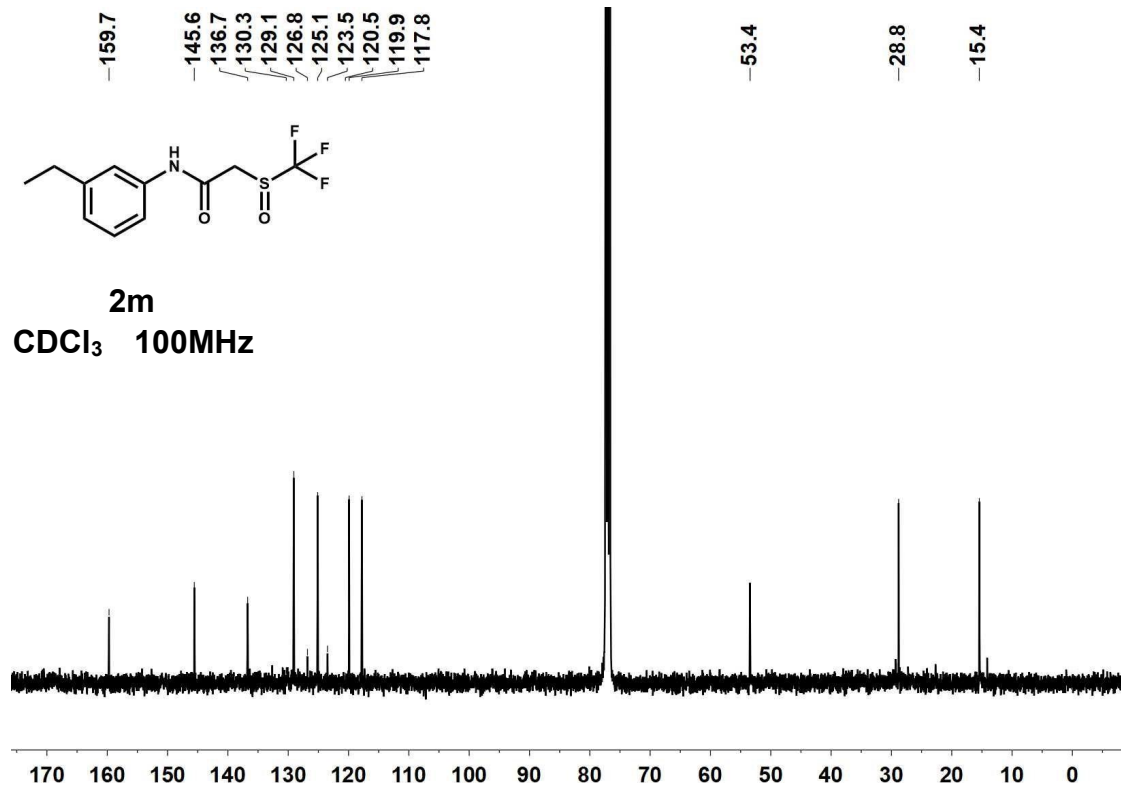

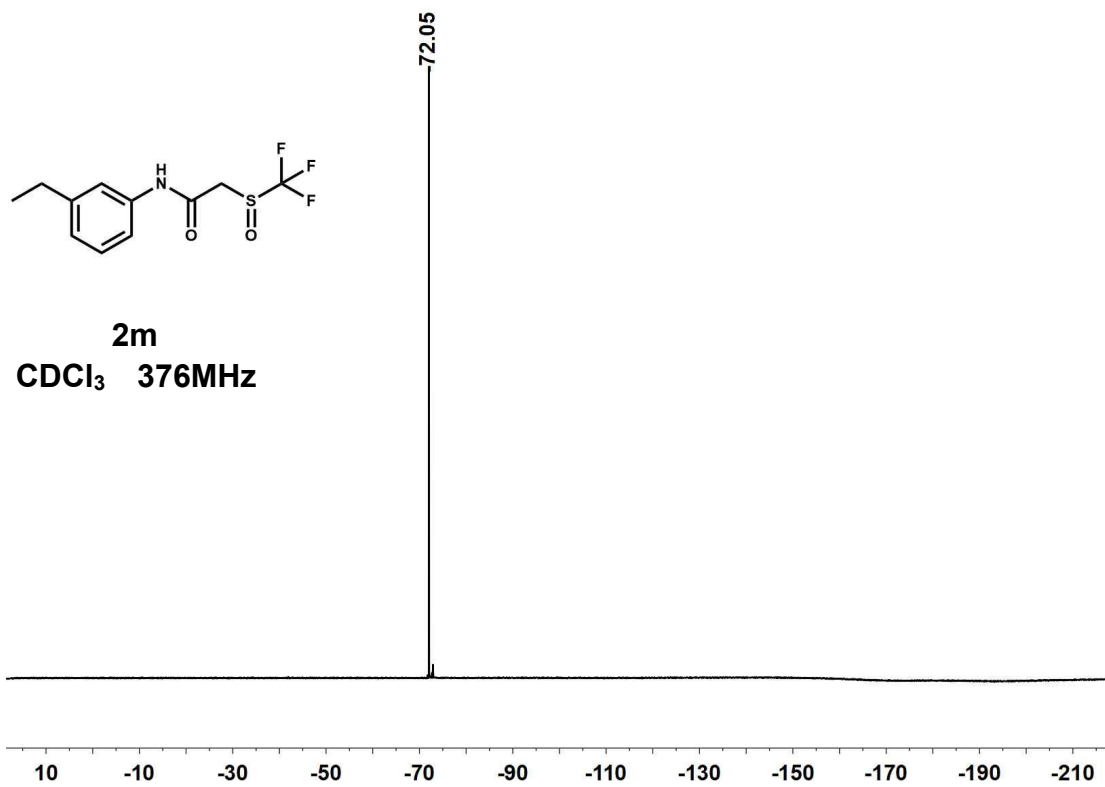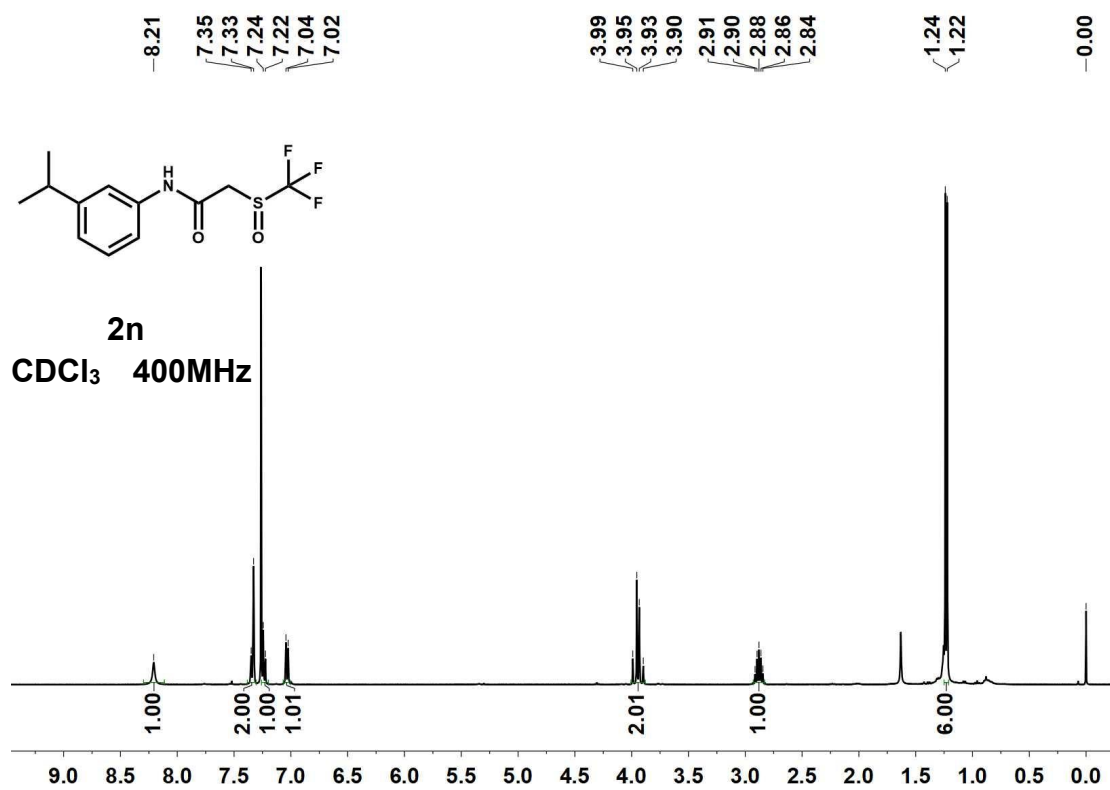

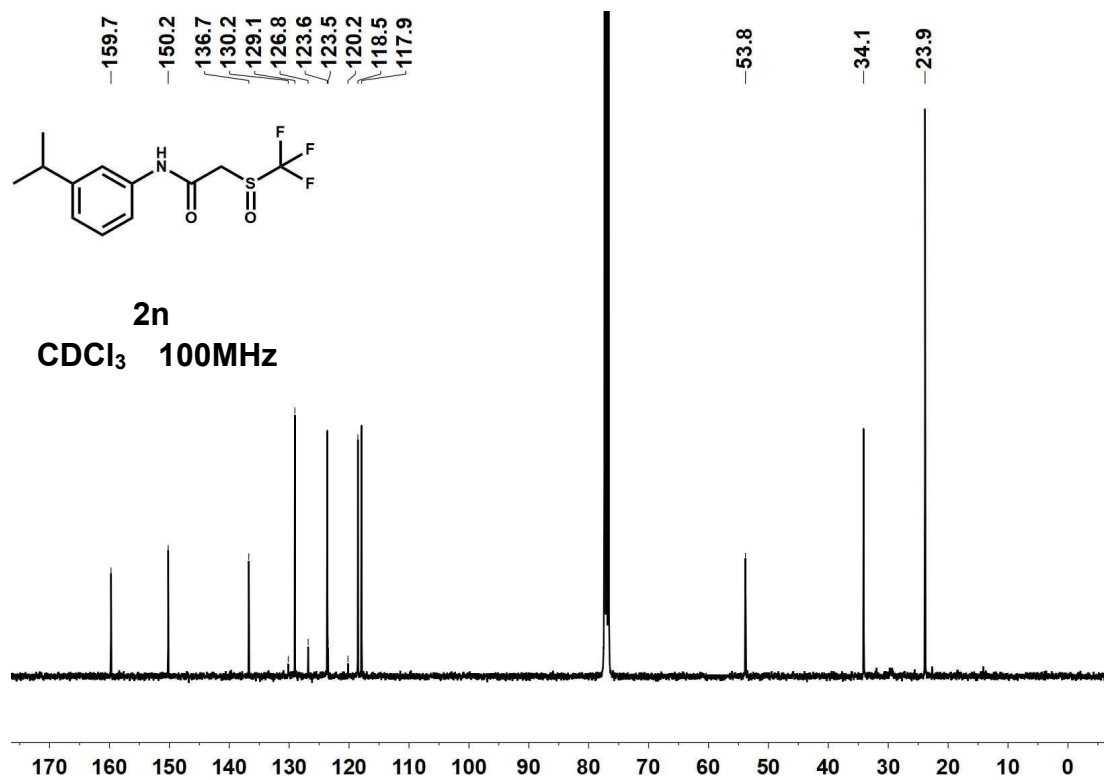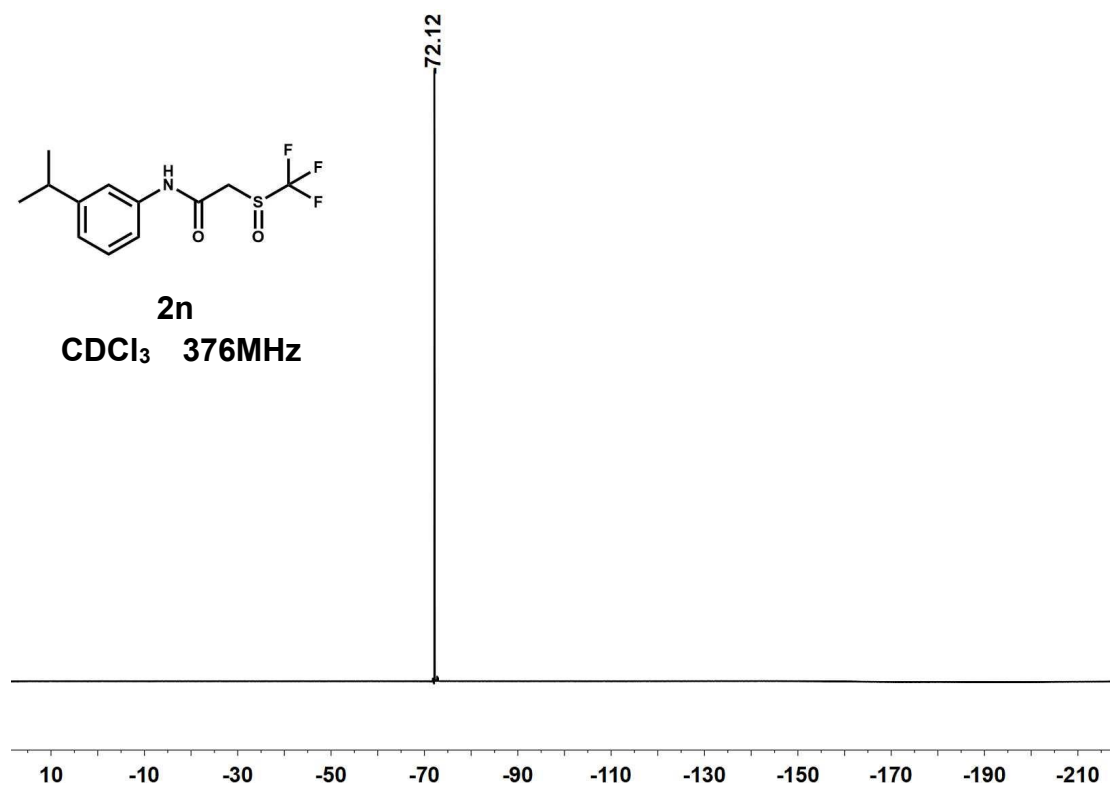

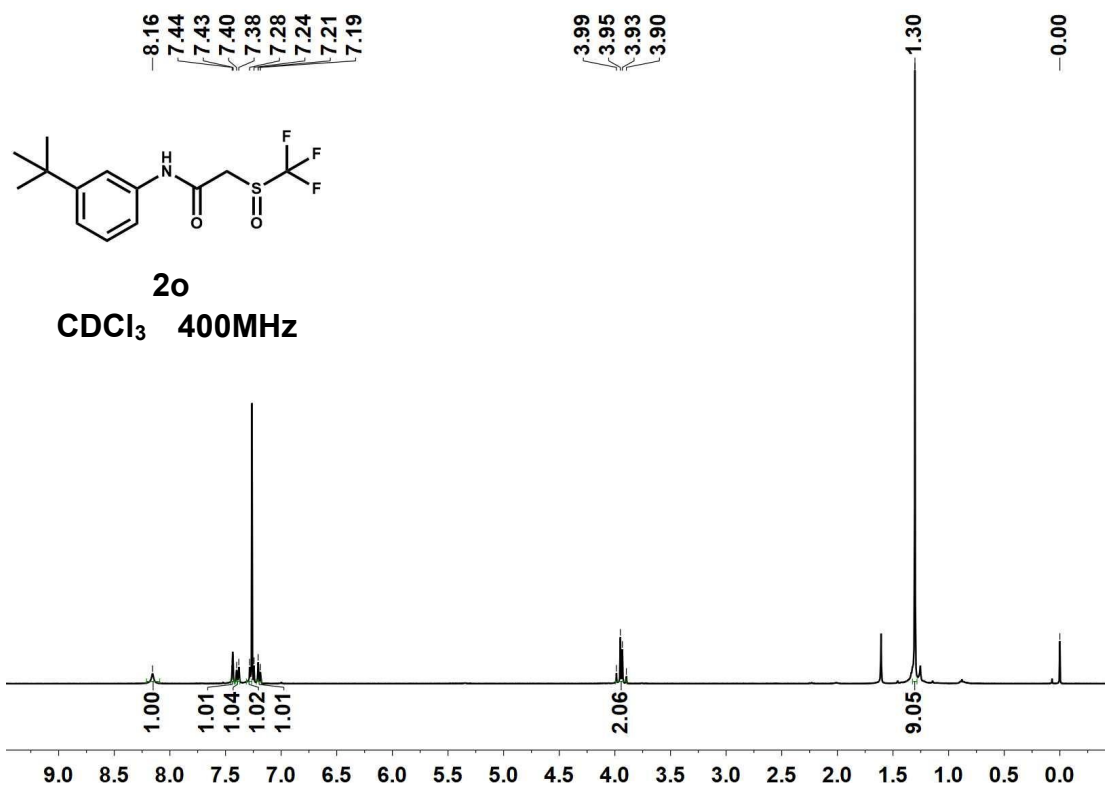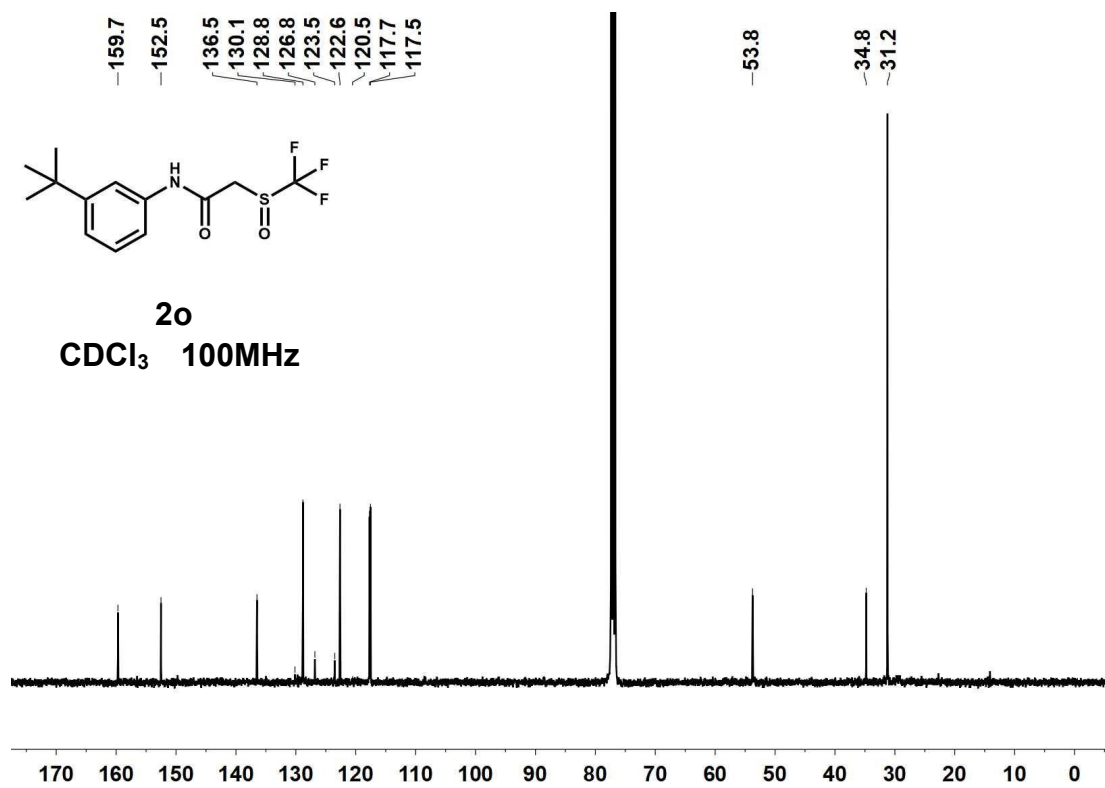

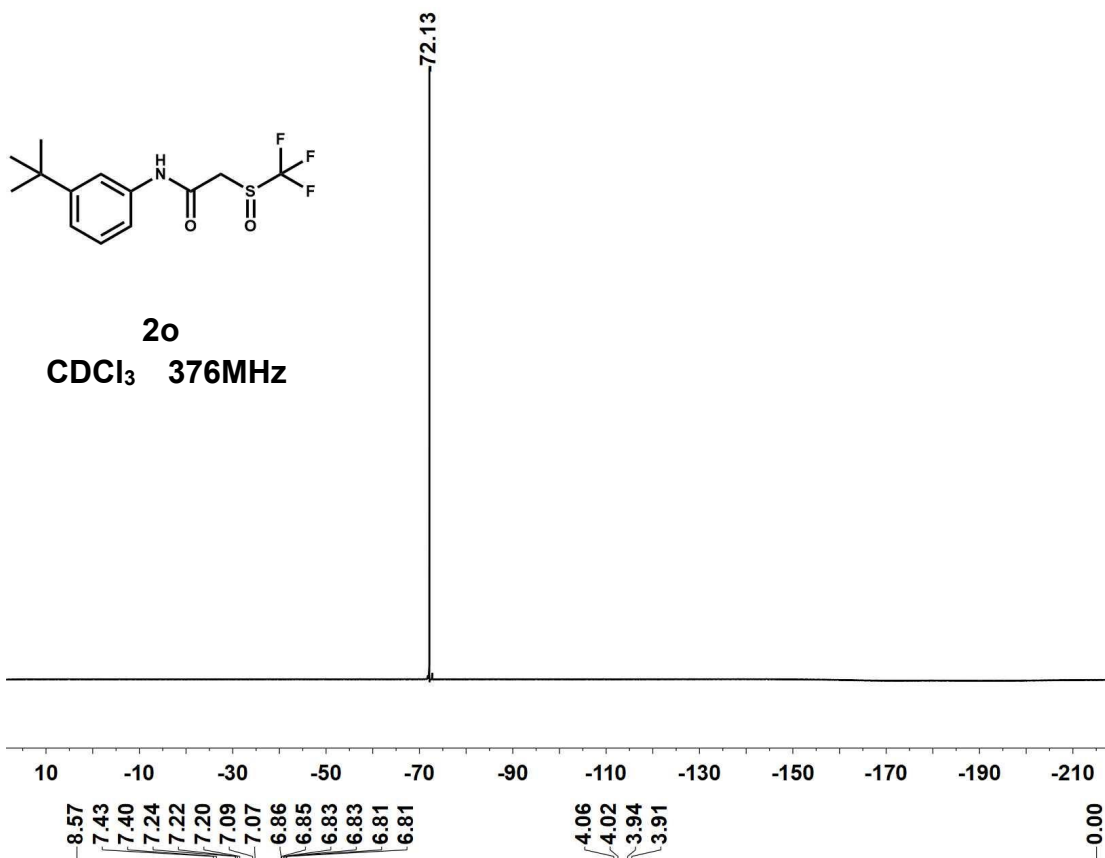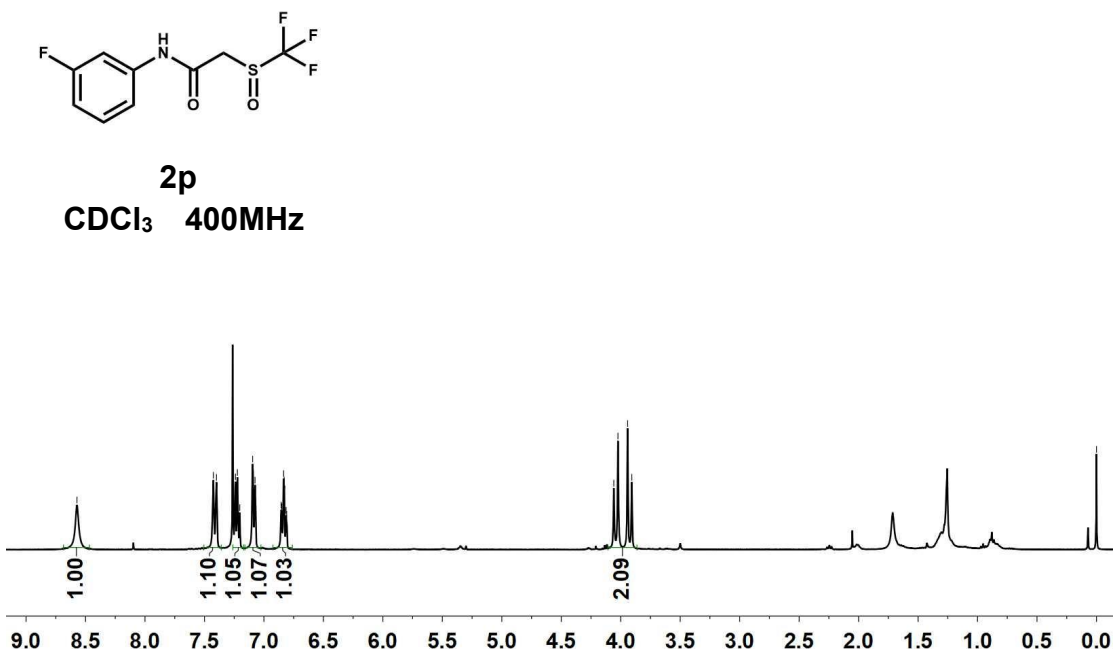

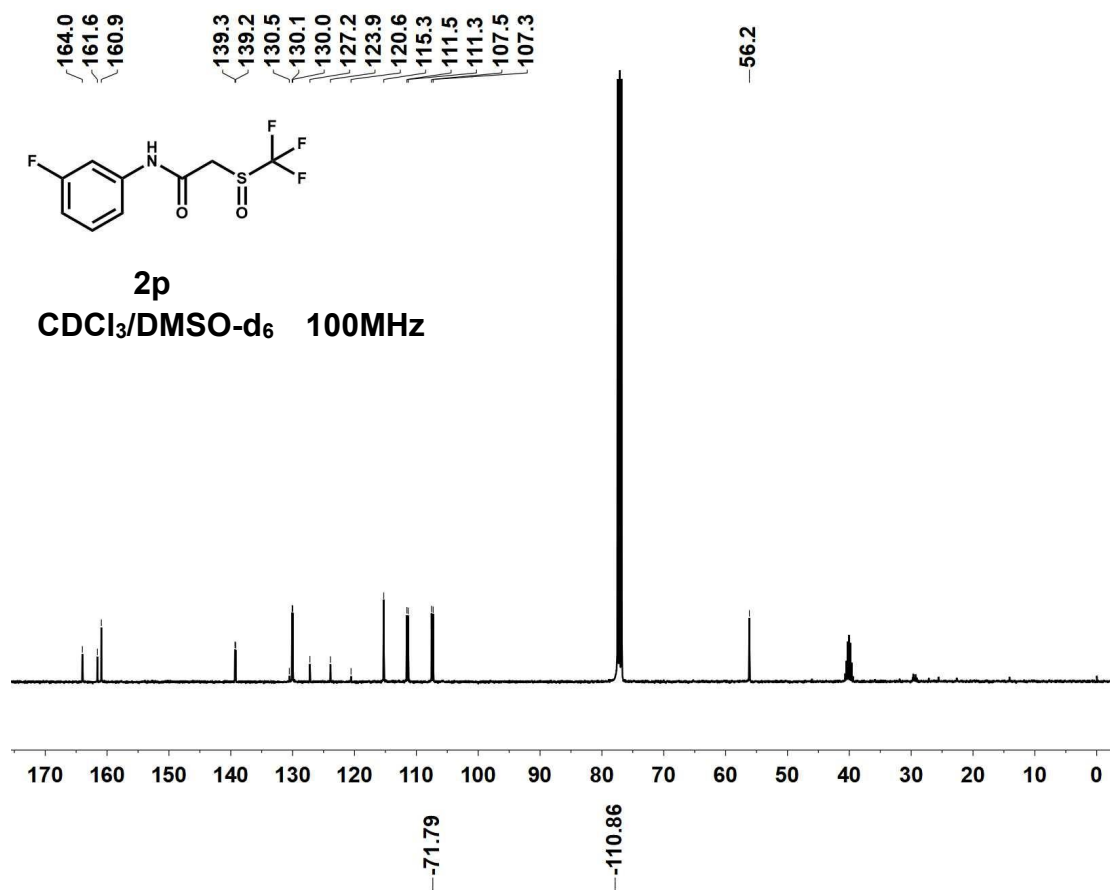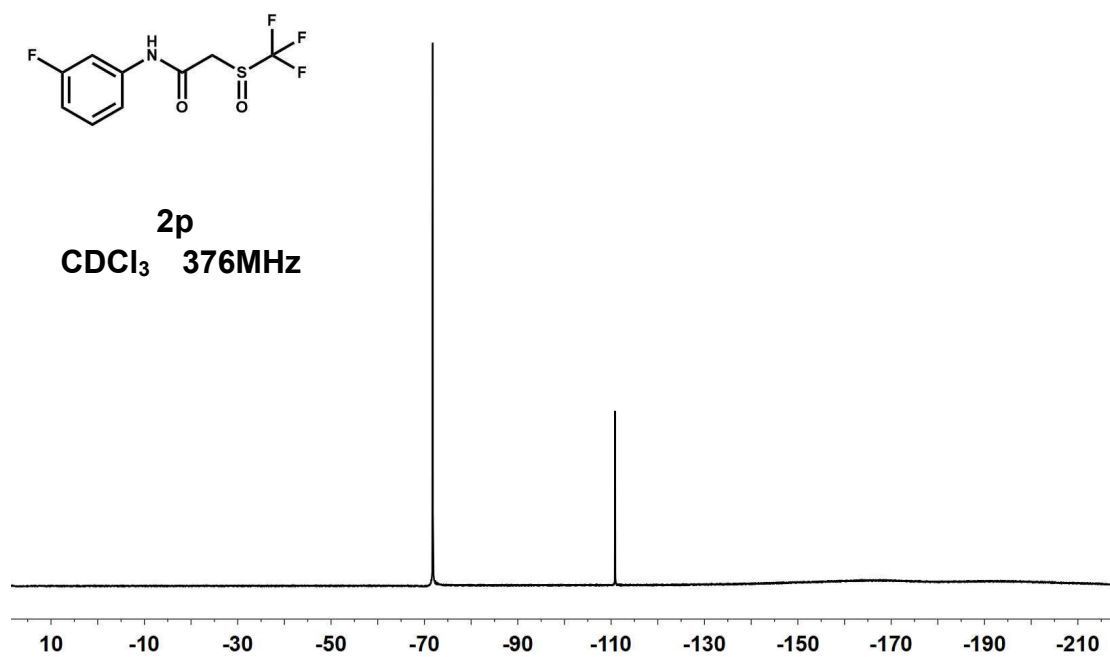

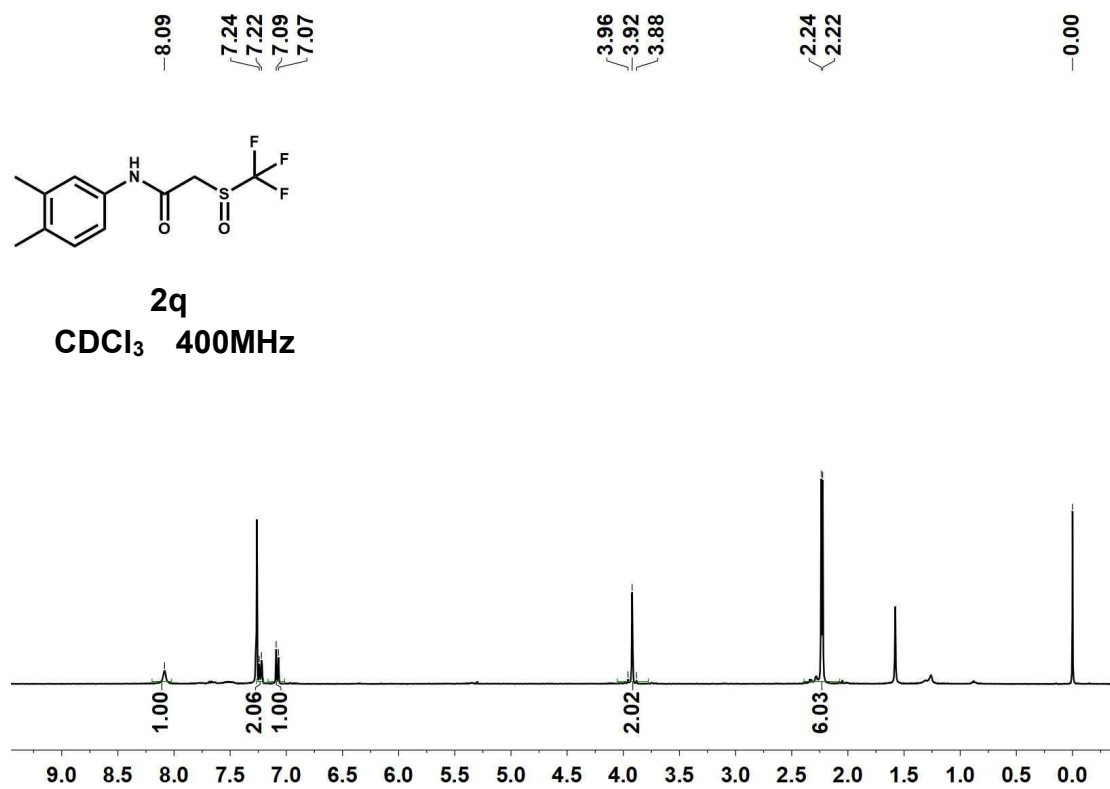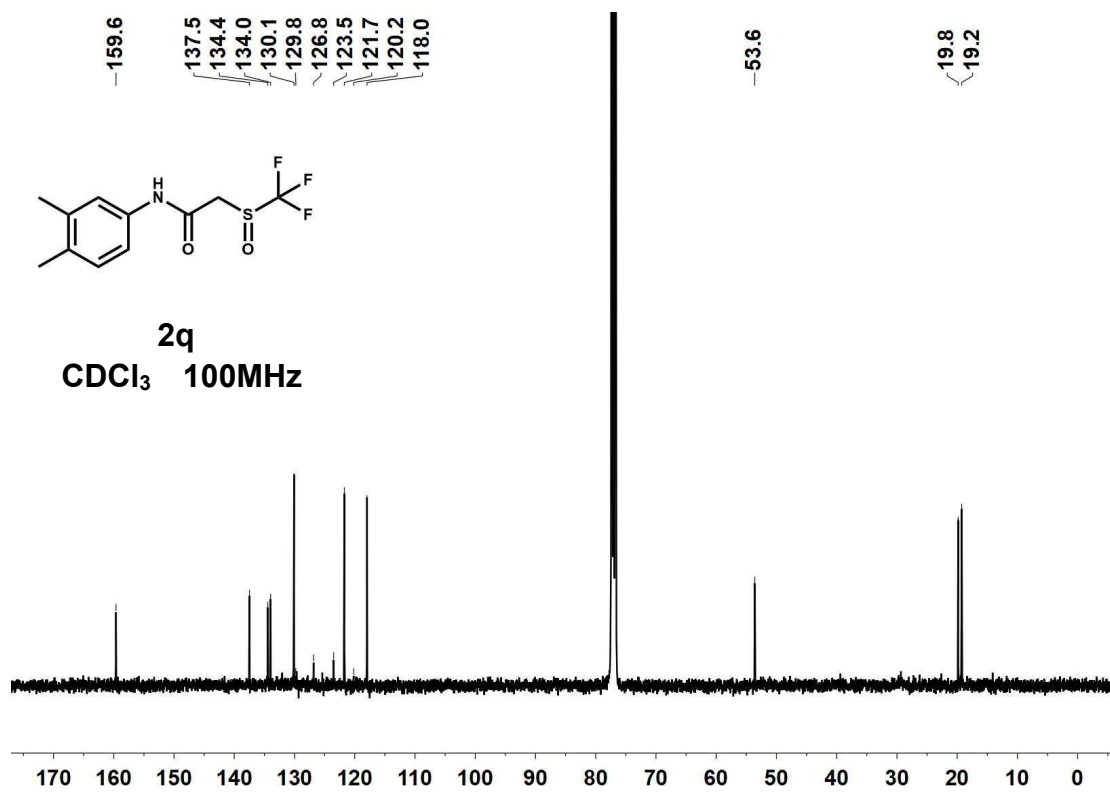

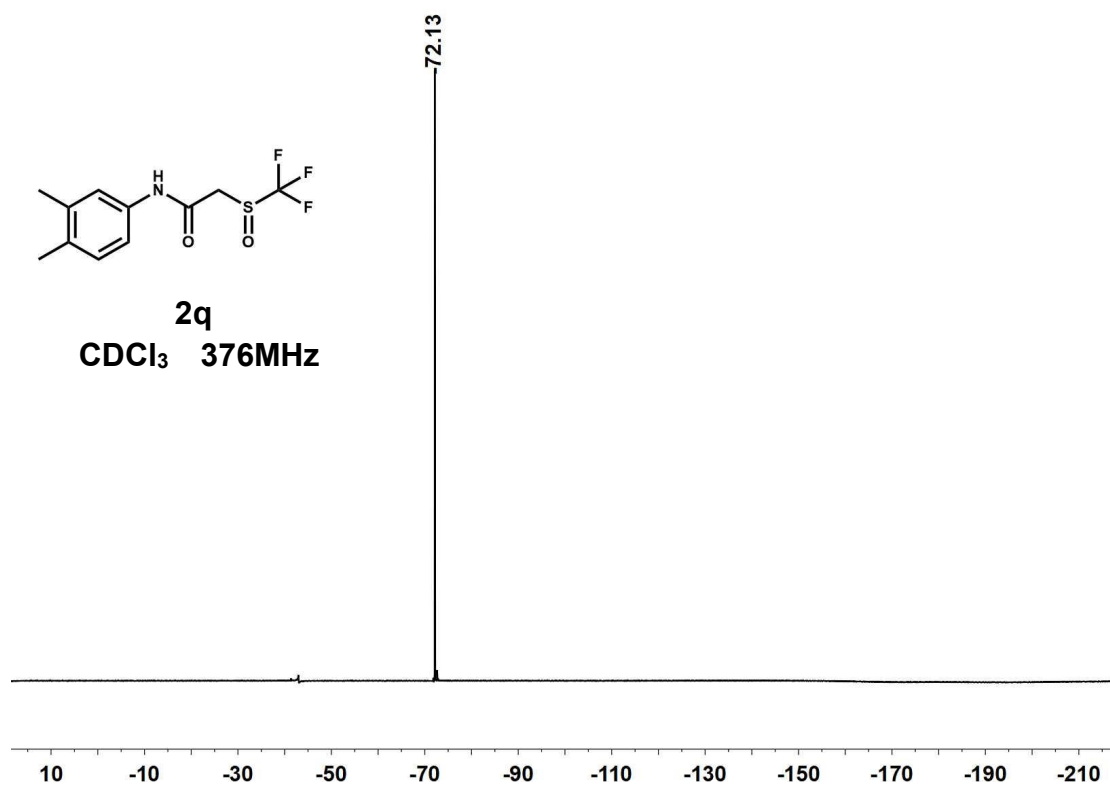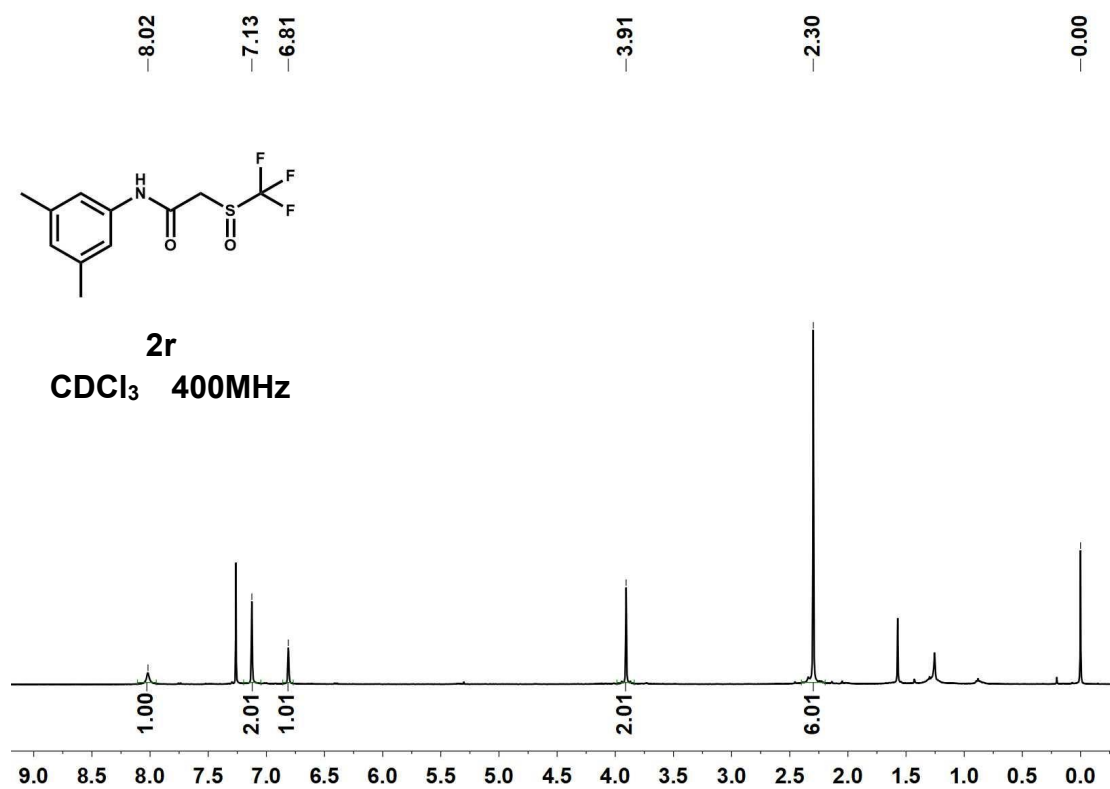



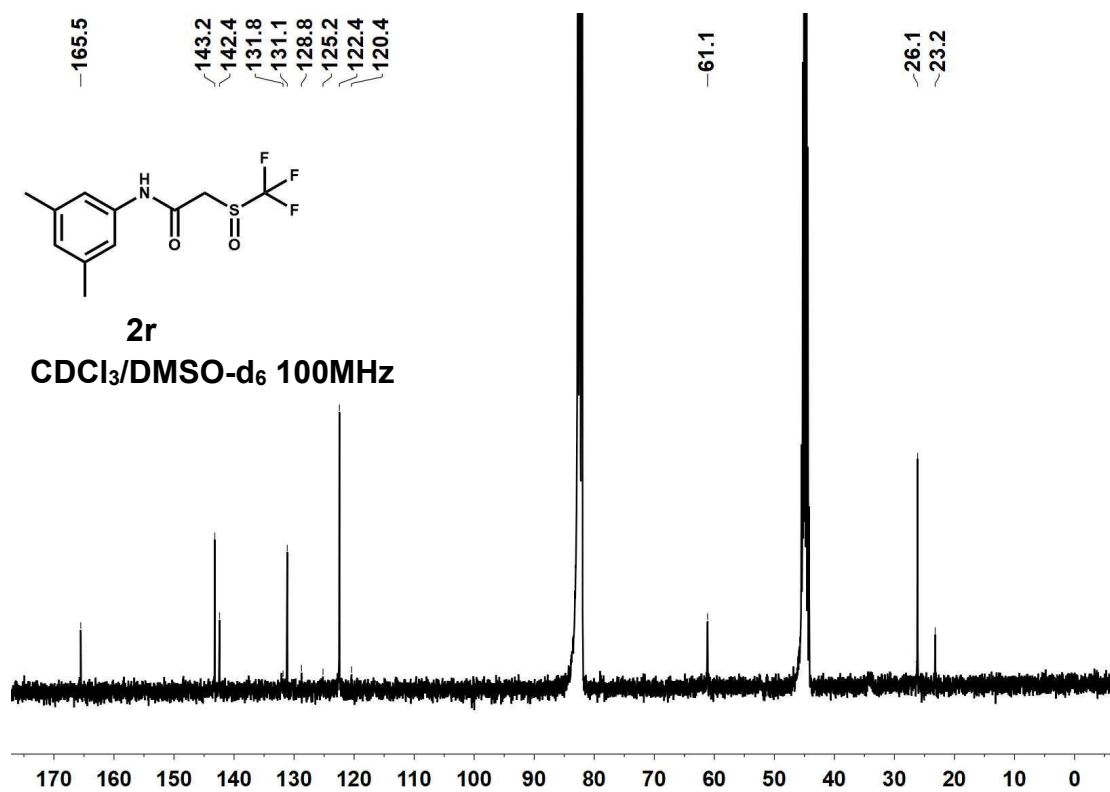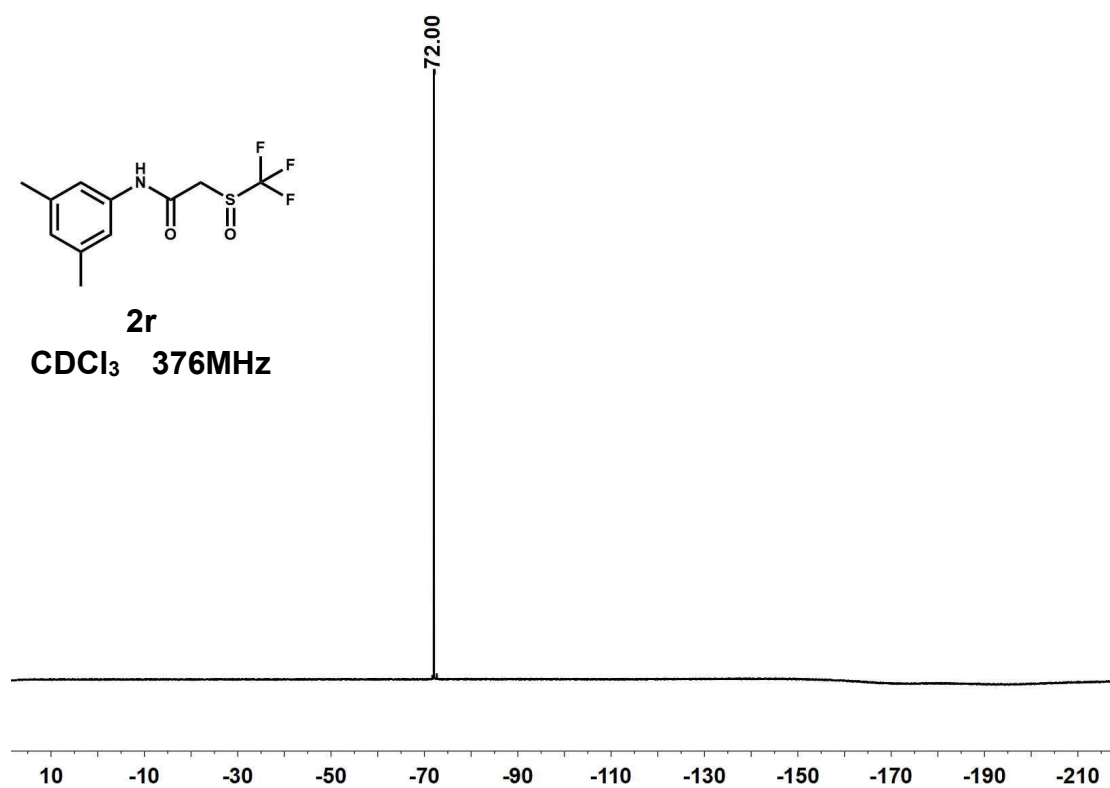

Supplement: d1qo01516h1.pdf [file d1qo01516h1.pdf]
